1 **Forty high-intensity interval training sessions blunt exercise-induced changes in the**  
2 **nuclear protein content of PGC-1 $\alpha$  and p53 in human skeletal muscle**

3 Cesare Granata<sup>1,2,\*</sup>, Rodrigo S.F. Oliveira<sup>1</sup>, Jonathan P. Little<sup>3</sup> and David J. Bishop<sup>1,4</sup>,

4 <sup>1</sup>Institute for Health and Sport, Victoria University, Melbourne, VIC, Australia

5 <sup>2</sup>Department of Diabetes, Central Clinical School, Monash University, Melbourne, VIC,  
6 Australia

7 <sup>3</sup>School of Health and Exercise Sciences, University of British Columbia Okanagan, Kelowna,  
8 BC, Canada

9 <sup>4</sup>School of Medical and Health Sciences, Edith Cowan University, Joondalup, WA, Australia.

10 **\*Corresponding author:** Cesare Granata, Department of Diabetes, Central Clinical School,  
11 Faculty of Medicine, Nursing and Health Sciences, Monash University, Alfred Centre, 99  
12 Commercial Rd, Melbourne, 3004, VIC, Australia. Tel: +61 3 99030531; Fax: +61 3 99053288;  
13 Email: [cesare.granata@monash.edu](mailto:cesare.granata@monash.edu)

14 **Running title:** Blunted mitochondrial adaptations post training

15 **ABSTRACT**

16 Exercise-induced increases in peroxisome proliferator-activated receptor  $\gamma$  coactivator-1 $\alpha$  (PGC-  
17 1 $\alpha$ ) and p53 protein content in the nucleus mediate the initial phase of exercise-induced  
18 mitochondrial biogenesis. Here we investigated if exercise-induced increases in these and other  
19 markers of mitochondrial biogenesis were altered after 40 sessions of twice-daily high-volume  
20 high-intensity interval training (HVT) in human skeletal muscle. Vastus lateralis muscle biopsies  
21 were collected from 10 healthy recreationally active participants before, immediately post, and  
22 3h after a session of HIIE performed at the same absolute exercise intensity before and after  
23 HVT (Pre-HVT and Post-HVT, respectively). The protein content of common markers of  
24 exercise-induced mitochondrial biogenesis were assessed in nuclear- and cytosolic-enriched  
25 fractions by immunoblotting; mRNA contents of key transcription factors and mitochondrial  
26 genes were assessed by qPCR. Despite exercise-induced increases in PGC-1 $\alpha$ , p53, and plant  
27 homeodomain finger-containing protein 20 (PHF20) protein content, the phosphorylation of p53  
28 and acetyl-CoA carboxylase (p-p53<sup>Ser15</sup> and p-ACC<sup>Ser79</sup>, respectively), and PGC-1 $\alpha$  mRNA Pre-  
29 HVT, no significant changes were observed Post-HVT. Forty sessions of twice-daily high-  
30 intensity interval training blunted all of the measured exercise-induced molecular events  
31 associated with mitochondrial biogenesis that were observed Pre-HVT. Future studies should  
32 determine if this loss relates to the decrease in relative exercise intensity, habituation to the same  
33 exercise stimulus, or a combination of both.

34 Keywords: endurance exercise, HIIT, mitochondrial adaptations, p53, PGC-1 $\alpha$

## 35 **Introduction**

36 Mitochondria are responsible for the production of the majority of the energy required to sustain  
37 daily activities and are a key regulator of energy homeostasis (31). The importance of  
38 mitochondria is underlined by the links between a healthy mitochondrial pool and enhanced  
39 endurance performance (37), improved health (52), and a reduced risk of several lifestyle-related  
40 chronic diseases (6, 46). Exercise has long been known to induce mitochondrial biogenesis (34) -  
41 the making of new components of the mitochondrial reticulum (22). These adaptations to  
42 exercise training have been proposed to result from the cumulative effect of transient changes in  
43 nuclear protein content (73) and mRNA expression (55) induced by each exercise session.

44 Peroxisome proliferator-activated receptor  $\gamma$  coactivator-1 $\alpha$  (PGC-1 $\alpha$ ) is a key regulator of  
45 exercise-induced mitochondrial biogenesis (74) (for an in-depth analysis of the effects of  
46 exercise on mitochondrial biogenesis mediated by PGC-1 $\alpha$  [and p53] the reader is referred to  
47 some excellent reviews; (17, 21, 35, 64)). In both rat (73) and human (24, 33, 43, 44) skeletal  
48 muscle, it has been observed that there is a post-exercise increase of PGC-1 $\alpha$  protein content in  
49 the nucleus, where PGC-1 $\alpha$  performs its transcriptional activity (62). Changes in PGC-1 $\alpha$  protein  
50 content (30), as well as the content of other proteins (e.g., p53 (36)), contribute to the exercise-  
51 induced upregulation of PGC-1 $\alpha$  mRNA (58). Exercise-induced increases in the mRNA levels of  
52 PGC-1 $\alpha$  and other genes (49, 55, 69), as well as the protein content of selected PGC-1 $\alpha$  upstream  
53 regulators (48) and selected mitochondrial proteins and transcription factors (55, 69) measured in  
54 whole muscle lysates, have been shown to be reduced as a training intervention progresses.

55 However, no study has investigated exercise-induced changes in the nuclear content of PGC-1 $\alpha$ ,  
56 or other important proteins modulating mitochondrial biogenesis, before and after a training  
57 intervention. Given that increased PGC-1 $\alpha$  protein content in the nucleus represents an important

58 process that contributes to the initial phase of exercise-induced mitochondrial biogenesis (73), it  
59 is important to better understand how the response of this transcriptional cofactor changes with  
60 training.

61 p53 is another important regulator of exercise-induced mitochondrial biogenesis in human  
62 skeletal muscle (64). Nuclear accumulation of p53 protein has been reported immediately (24),  
63 or 3 hours (70), after a single session of exercise. While the mechanisms underlying the nuclear  
64 accumulation of p53 are complex (47, 53), they have partly been attributed to phosphorylation of  
65 p53 at serine 15 (p-p53<sup>Ser15</sup>) (53) - a posttranslational modification that enhances p53 protein  
66 stability (68) and prevents its nuclear export and cytosolic degradation (32, 53). However, once  
67 again, these molecular events have only been investigated following a single exercise session,  
68 and it is not known if they are altered by training. Given that the majority of the p53 activity  
69 takes place in the nucleus (53), it is important to determine if the early events of the p53-  
70 mediated exercise-induced mitochondrial biogenesis are differentially regulated in this  
71 subcellular compartment as the training intervention progresses.

72 Therefore, the aim of our study was to investigate if a session of high-intensity interval exercise  
73 (HIIE), performed at the same absolute workload before and after a period of high-volume  
74 training (HVT; 40 sessions of high-intensity interval training [HIIT] performed twice-daily for  
75 20 consecutive days), induces similar increases in the protein content of PGC-1 $\alpha$ , p53, and p-  
76 p53<sup>Ser15</sup> in the nucleus. Upstream signaling, as well as the mRNA content of several genes  
77 involved in exercise-induced mitochondrial biogenesis, were also investigated before and after  
78 HVT. The same absolute workload was chosen as this approach is often used in training studies  
79 (22), as well as in practice, where individuals regularly repeat the same exercise session. We  
80 hypothesized that 40 sessions of HIIT would result in significantly reduced exercise-induced

81 increases in these events mediating exercise-induced mitochondrial biogenesis. Despite debate  
82 regarding how well exercise-induced molecular events can predict training-induced adaptations  
83 (22), findings from the present study will provide a better understanding of how molecular  
84 signals are altered when the same exercise stimulus is repeated. This will also improve our  
85 knowledge of the mechanisms underlying the common observation of smaller fitness gains as  
86 training progresses (42, 45), and may inform strategies to maintain the effectiveness of exercise  
87 to stimulate mitochondrial biogenesis.

88

## 89 **Materials and methods**

### 90 *Participants*

91 Ten healthy men ( $20 \pm 2$  y;  $180 \pm 12$  cm;  $80 \pm 15$  kg;  $46.2 \pm 7.6$  mL · min<sup>-1</sup> · kg<sup>-1</sup>), who were not  
92 regularly engaged in cycling-based sports, were moderately-trained (i.e., undertaking moderate,  
93 unstructured aerobic activity for less than 3 to 4 hours per week for at least 6 months prior to the  
94 study), and were non-smokers and free of medications, volunteered to participate in this study.  
95 Upon passing an initial medical screening participants were informed of the study requirements,  
96 risks, and benefits, before giving written informed consent. All experimental protocols and study  
97 procedures were approved by the Victoria University Human Research Ethics Committee and  
98 conformed to the standards set by the latest revision of the Declaration of Helsinki. All  
99 participants completed the study; however, due to the limited amount of muscle tissue harvested  
100 during the second biopsy trial, data from one participant were excluded (including physiological  
101 and performance data).

### 102 *Study design and testing*

103 This research was part of a larger, previously-published study investigating the effect of different  
104 training volumes on mitochondrial adaptations (23). The experimental protocol specific to the  
105 portion of the study described in this manuscript consisted of three tests, each separated by 48 to  
106 72 hours, repeated before and after the HVT: a 20-km cycling time trial (20k-TT), a graded  
107 exercise test (GXT) and a HIIE biopsy trial (Pre-HVT and Post-HVT). During the 20 days of  
108 HVT participants performed HIIT twice a day (Figure 1). Prior to beginning this phase of the  
109 larger study, participants were familiarized with the 20k-TT, the GXT and the HIIE, and  
110 completed the normal volume training (NVT) phase (12 HIIT sessions in 4 weeks; Figure 1). It  
111 has been reported that the transcriptional response to the first session of exercise (first bout effect  
112 (4)) can differ significantly from the response to subsequent exercise sessions (4, 50, 55, 72).  
113 Thus, the NVT phase served not only to habituate participants to the rigors of twice-daily HIIT  
114 during the HVT phase, but also to eliminate possible biases brought about by the “first-bout”  
115 effect (4). Finally, participants were required to refrain from vigorous exercise for the 72 h  
116 preceding each test, from alcohol for 24 h before testing, and from food and caffeine  
117 consumption for 3 h before each test. Although the lack of a “no exercise” control group could  
118 be considered a limitation of this study, it has previously been reported that there are no changes  
119 in upstream regulators of mitochondrial biogenesis in a “no exercise” control group (26).

120 *20k-TT*. Cycling time trials were performed on an electronically-braked cycle ergometer  
121 (Velotron, RacerMate, USA) after a 6-min warm-up were participants cycled for 4 min at 66% of  
122 the power attained at the lactate threshold ( $\dot{W}_{LT}$ ), followed by 2 min at  $\dot{W}_{LT}$ , and 2 min of rest.  
123 During these tests, participants were only allowed access to cadence and completed distance.  
124 Heart rate was monitored (Polar-Electro, Finland) during all exercise trials and training sessions.

125 *GXT*. A discontinuous graded exercise test was performed on an electronically-braked cycle  
126 ergometer (Lode Excalibur, v2.0, The Netherlands) to determine peak oxygen uptake ( $\dot{V}O_{2\text{peak}}$ ),  
127 peak power ( $\dot{W}_{\text{peak}}$ ), and  $\dot{W}_{\text{LT}}$  (using the modified  $D_{\text{max}}$  method (5)), and the exercise intensity for  
128 both the biopsy trial and the HVT training sessions, as previously described (25). Briefly, the test  
129 began at 60, 90, or 120 W, depending on participants' fitness levels, and was increased by 30 W  
130 every 4 min. Stages were interspersed with 30-s breaks for the measurement of fingertip  
131 capillary blood lactate concentration using a pre-calibrated blood-lactate analyzer (YSI 2300  
132 STAT Plus, YSI, USA). Participants were instructed to keep a cadence above 60 rpm and were  
133 only allowed access to cadence and elapsed time; the GXT was terminated when participants  
134 reached volitional exhaustion or cadence dropped below 60 rpm. The  $\dot{W}_{\text{peak}}$  was determined as  
135 the power of the last completed stage plus 7.5 W for every additional minute completed.  $O_2$  and  
136  $CO_2$  concentrations were analyzed from expired air using a pre-calibrated gas analyzer (Moxus  
137 2010, AEI technologies, USA), and  $\dot{V}O_2$  values were recorded every 15 s. The average of the  
138 two highest consecutive 15-s values was recorded as a participant's  $\dot{V}O_{2\text{peak}}$ . The same GXT was  
139 performed after 20 days of training to determine the relative exercise intensity of the Post-HVT  
140 biopsy trial.

141 *Pre- and Post-HVT HIIE biopsy trials*. Each participant performed the two biopsy trials in the  
142 morning and at the same time, to avoid variations caused by circadian rhythms. Participants were  
143 provided with a standardized dinner ( $55 \text{ kJ}\cdot\text{kg}^{-1}$  body mass (BM), providing 2.1 g  
144 carbohydrate $\cdot\text{kg}^{-1}$  BM, 0.3 g fat $\cdot\text{kg}^{-1}$  BM, and 0.6 g protein $\cdot\text{kg}^{-1}$  BM) and breakfast ( $41 \text{ kJ}\cdot\text{kg}^{-1}$   
145 BM, providing 1.8 g carbohydrate $\cdot\text{kg}^{-1}$  BM, 0.2 g fat $\cdot\text{kg}^{-1}$  BM, and 0.3 g protein $\cdot\text{kg}^{-1}$  BM) to  
146 minimize variability in muscle gene and protein expression attributable to diet, as previously  
147 described (23). While participants rested in the supine position, and after injection of local

148 anesthetic (1% xylocaine) into the skin and fascia of the vastus lateralis muscle, three small  
149 incisions were made about 2-3 cm apart. A resting muscle biopsy was taken (Rest) using a  
150 biopsy needle with suction. Approximately ten minutes later participants were helped to an  
151 electronically-braked cycle ergometer (Velotron, RacerMate, USA) and began a warm up  
152 consisting of cycling for four minutes at 66% of  $\dot{W}_{LT}$ , followed by 2 min at  $\dot{W}_{LT}$ , and 2 min of  
153 rest, after which the Pre-HVT HIIE session began. HIIE consisted of five 4-min intervals at an  
154 exercise intensity equal to  $\dot{W}_{LT} + 0.2 (\dot{W}_{peak} - \dot{W}_{LT})$ , interspersed with two minutes of recovery at  
155 60 W. Immediately after termination of HIIE (~5 to 10 s), a second skeletal muscle biopsy was  
156 taken (+0 h), while a third one was obtained after three hours of recovery (+3 h), during which  
157 time participants were allowed access to water *ab libitum* and had no access to food. Skeletal  
158 muscle samples were rapidly cleaned of excess blood, fat, and connective tissue, were snap  
159 frozen in liquid nitrogen, and later stored at -80°C for subsequent analyses. By design, the Post-  
160 HVT HIIE biopsy trial was performed at the same absolute exercise intensity used during the  
161 Pre-HVT trial, and followed an identical format.

162 *HVT*. The day following the Pre-HVT HIIE biopsy trial participants began HIIT twice a day for  
163 20 consecutive days. Training sessions were performed in the morning and afternoon and  
164 consisted of either 4- or 2-min intervals, interspersed with a 2- or 1-min recovery period at 60 W,  
165 respectively. To avoid stagnation, the training stimulus was progressively increased daily by  
166 virtue of increasing either the relative exercise intensity (from  $\dot{W}_{LT} + 0.3 (\dot{W}_{peak} - \dot{W}_{LT})$  to  $\dot{W}_{LT} +$   
167  $0.8 (\dot{W}_{peak} - \dot{W}_{LT})$  for the 4-min intervals, and from  $\dot{W}_{LT} + 0.5 (\dot{W}_{peak} - \dot{W}_{LT})$  to  $\dot{W}_{LT} + 0.8 (\dot{W}_{peak}$   
168  $- \dot{W}_{LT})$  for the 2-min intervals), or the number of repetitions (from five to twelve bouts for the 4-  
169 min intervals, and from eight to twenty-two bouts for the 2-min intervals) (23). As a result,  
170 single-session duration increased from 30–35 min to 70–80 min. All participants progressively



171 increased their relative exercise intensity and number of repetitions. A 10-km cycling time trial  
172 was performed before, and at regular weekly intervals during, the HVT to monitor participants  
173 for signs of overreaching, as previously described (23). The intention was to prevent  
174 overreaching by reducing the training load if performance decreased by more than 10% (28).  
175 However, no participants experienced a performance loss throughout the entire study, and the  
176 training protocol was completed as planned. All participants completed a minimum of 36  
177 (equivalent to 90%) training sessions; average compliance was 96.5% of the prescribed number  
178 of sessions.

### 179 *Skeletal muscle analyses*

180 *Subcellular fractionation.* Nuclear and cytosolic fractions were prepared from 35 to 50 mg of  
181 skeletal muscle using a commercially-available nuclear extraction kit (NE-PER, Pierce, USA).  
182 Briefly, muscle samples were washed in phosphate-buffered saline (PBS), homogenized in CER-  
183 I buffer containing a protease/phosphatase inhibitor cocktail (Cell Signaling Technology [CST],  
184 5872) and centrifuged at ~16,000 g. The supernatant was taken as the crude cytosolic fraction.  
185 The pellet containing nuclei was washed six times in PBS to minimize cytosolic contamination  
186 and nuclear protein was extracted by centrifugation (~16,000 g) in a high-salt NER buffer  
187 supplemented with the same inhibitors cocktail and following the manufacturers' instructions.  
188 Protein concentration was determined in triplicate using a commercial colorimetric assay (Bio-  
189 Rad Protein Assay kit-II; Bio-Rad, Gladesville, NSW, Australia). Nuclear and cytosolic fraction  
190 enrichment was confirmed by blotting the separated fractions against a nuclear (histone H3) and  
191 a cytosolic (lactate dehydrogenase A [LDHA]) protein; histone H3 was mainly detected in  
192 nuclear fractions, whereas LDHA was mainly detected in cytosolic fractions (Figure 2A),  
193 indicating the subcellular fractionation enrichment was successful.

194 *Immunoblotting.* Muscle lysates (10 to 50  $\mu$ g) were separated by electrophoresis using SDS-  
195 PAGE gels (8-15%) as previously described (24). An internal standard was loaded in each gel,  
196 and each lane was normalized to this value to reduce gel-to-gel variability. Whole-lane  
197 Coomassie blue staining (71) was performed to verify correct loading and equal transfer between  
198 lanes (Figure 2B). The following primary antibodies were used (supplier, catalogue number):  
199 histone H3 (CST, 9715), LDHA (CST, 2012), p53 (CST, 2527), p-acetyl-CoA carboxylase (p-  
200 ACC<sup>Ser79</sup>; CST, 3661), PGC-1 $\alpha$  (Calbiochem, st-1202), plant homeodomain finger-containing  
201 protein 20 (PHF20; CST, 3934), and p-p53<sup>Ser15</sup> (CST, 9284). Representative images for all target  
202 proteins are presented in Figure 2C.

203 *Total RNA isolation.* Total RNA was isolated from ~15 mg of muscle tissue as previously  
204 described (14). Briefly, samples were homogenized (FastPrep FP120 Homogenizer; Thermo  
205 Savant) in the presence of 1 g of zirconia/silica beads (1.0 mm; Daintree Scientific, St. Helens,  
206 TAS, Australia) and 800  $\mu$ L of TRIzol® Reagent (Invitrogen, Melbourne, Australia). Lysates  
207 were centrifuged at 13,000 rpm for 15 min at 4°C; the supernatant was collected, combined with  
208 chloroform (Sigma-Aldrich, St Louis, USA), and total RNA was extracted using the TRIzol®  
209 protocol as per manufacturer's instructions. RNA precipitation was performed for at least 2 h at -  
210 20°C in the presence of 400  $\mu$ L of isopropanol and 10  $\mu$ L of 5 M NaCl (both Sigma-Aldrich, St  
211 Louis, USA). RNA concentration was determined spectrophotometrically (Nanodrop ND1000,  
212 Thermo Fisher Scientific, USA) by measuring the absorbance at 260 (A260) and 280 (A280) nm,  
213 with A260/A280 ratios > 1.8 indicating high-quality RNA (41). To ensure RNA was free of  
214 DNA contamination samples were DNase treated using an RQ1 RNase-free DNase kit (Promega  
215 Corporations, Madison, USA).

216 *Real-time PCR (qPCR)*. First-strand cDNA synthesis was performed on 300 ng of total RNA  
217 using a thermal cycler (S1000 Thermal Cycler; Bio-Rad; Bio-Rad, Gladesville, NSW, Australia)  
218 and the commercially available iScript™ cDNA synthesis kit (Bio-Rad, Gladesville, NSW,  
219 Australia) in the presence of random hexamers and oligo(dT)s, according to the manufacturer's  
220 directions. Forward and reverse primers for all genes investigated (Table 1) were designed based  
221 on NCBI RefSeq using NCBI Primer-BLAST ([www.ncbi.nlm.nih.gov/BLAST/](http://www.ncbi.nlm.nih.gov/BLAST/)), and specificity  
222 of the amplified product was confirmed by melting point dissociation curves. The mRNA  
223 expression of cytochrome *c* (*cyt c*), heat shock 70 kDa protein 1A (HSPA1A, usually referred to  
224 as HSP70), histone acetyltransferase KAT2A (KAT2A, usually referred to as general control of  
225 amino-acid synthesis 5 [GCN5]), nuclear respiratory factor 1 (NRF-1) and 2 (NRF-2), p53, PGC-  
226 1 $\alpha$ , PHF20, peroxisome proliferator-activated receptor alpha (PPAR $\alpha$ ), peroxisome proliferator-  
227 activated receptor delta (PPAR $\delta$ ), peroxisome proliferator-activated receptor gamma (PPAR $\gamma$ ),  
228 NAD-dependent protein deacetylase sirtuin-1 (SIRT1), and mitochondrial transcription factor A  
229 (TFAM) were quantified by quantitative real-time PCR (Mastercycler® RealPlex2, Eppendorf,  
230 Germany), using SYBR Green chemistry (iTaq™ Universal SYBR® Green Supermix; Bio-  
231 Rad, Gladesville, NSW, Australia) (10  $\mu$ L PCR reaction volume). All samples were run in  
232 duplicate simultaneously with template free controls, using an automated pipetting system  
233 (epMotion 5070, Eppendorf, Germany) to reduce technical variation (41). The following PCR  
234 cycling patterns were used: initial denaturation at 95°C (3 min), 40 cycles of 95°C (15 s) and  
235 60°C (60 s). Relative changes in mRNA content were calculated using the  $2^{-\Delta\Delta C_t}$  method. To  
236 account for the efficiency of RT and initial RNA concentration, the mRNA expression of four  
237 housekeeping genes was quantified, and their stability was determined using the BestKeeper  
238 software (56). Cyclophilin, glyceraldehyde 3-phosphate dehydrogenase (GAPDH), and beta-2-

239 microglobulin (B2M) were classified as stable, whereas TATA-binding protein (TBP) was  
240 reported as unstable and was therefore excluded. These results were confirmed by the  
241 Normfinder algorithm (2).

#### 242 *Statistical analysis*

243 All values are reported as mean  $\pm$  SD unless otherwise specified. Outliers (defined as values  
244 outside the mean  $\pm$  3SD) were first removed. Normality was assessed with a Shapiro-Wilk test;  
245 datasets that failed the normality test ( $P < 0.05$ ) were log transformed, and if the dataset was still  
246 non-normal the reciprocal value was used. To investigate the influence of exercise (Rest, +0 h,  
247 and +3 h) and training (Pre-HVT and Post-HVT), and the interaction between these two  
248 variables, two-way ANOVA with repeated measures were performed. Interactions were followed  
249 by Tukey's honestly significant difference post-hoc tests to assess differences between time  
250 points (both within and between trials). In addition, main effects of exercise were further  
251 analyzed with pre-planned contrasts comparing the effect of exercise within biopsy trials only.  
252 Resting protein and mRNA content values in the Pre- and Post-HVT trials were also compared  
253 with a pre-planned paired t-test, to determine the effects of 40 sessions of HIIT. SigmaPlot 13.0  
254 software (Jandel Scientific, USA) was used for all statistical analyses. The level of statistical  
255 significance was set a priori at  $P < 0.05$ .

256

## 257 **Results**

258 *Total work during the biopsy trials*

259 By design, the Pre- and Post-HVT HIIE sessions were performed at the same absolute exercise  
260 intensity ( $231.1 \pm 33.1$  W, Figure 3) and resulted in the same total work ( $277.3 \pm 39.8$  kJ). There  
261 was an increase ( $9.0 \pm 6.1\%$ ,  $P = 0.002$ ) in the power attained at the lactate threshold ( $\dot{W}_{LT}$ )  
262 following training ( $215.5 \pm 32.2$  vs.  $234.7 \pm 36.8$  W, Pre- and Post-HVT, respectively; Figure 3),  
263 which resulted in the relative exercise intensity of the Pre-HVT biopsy trial ( $107.4 \pm 1.2\%$  of  
264  $\dot{W}_{LT}$ ) being greater than the Post-HVT biopsy trial ( $98.8 \pm 5.2\%$  of  $\dot{W}_{LT}$ ). Following training,  
265 there was also an increase in peak power ( $\dot{W}_{peak}$ ) ( $7.8 \pm 4.4\%$ ,  $P = 0.001$ ;  $292.5 \pm 37.9$  vs.  $315.2$   
266  $\pm 42.3$  W, Pre- and Post-HVT, respectively; Figure 3); consequently, the exercise intensity  
267 expressed relative to  $\dot{W}_{peak}$  was also greater in the Pre-HVT biopsy trial ( $78.9 \pm 2.4\%$  of  $\dot{W}_{peak}$ )  
268 than the Post-HVT biopsy trial ( $73.3 \pm 3.7\%$  of  $\dot{W}_{peak}$ ). Post-HVT, there was an increase in peak  
269 oxygen uptake ( $\dot{V}O_{2peak}$ ) ( $11.7 \pm 7.6\%$ ,  $P = 0.001$ ;  $46.2 \pm 7.6$  vs.  $51.4 \pm 7.8$  mL  $\cdot$  min $^{-1}$   $\cdot$  kg $^{-1}$ , Pre-  
270 and Post-HVT, respectively), whereas 20-km cycling time trial (20k-TT) time was decreased  
271 ( $5.2 \pm 2.3\%$ ,  $P < 0.001$ ;  $2140.8 \pm 99.9$  vs.  $2028.1 \pm 87.5$  s, Pre- and Post-HVT, respectively). The  
272 participants' BM did not change post training ( $0.2 \pm 1.6\%$ ,  $P = 0.720$ ;  $80.4 \pm 14.8$  vs.  $80.6 \pm$   
273  $14.5$  kg, Pre- and Post-HVT, respectively).

#### 274 *Muscle analyses*

275 Representative immunoblots are presented in Figure 2C.

276 *PGC-1 $\alpha$  protein content.* There was an interaction effect in both subcellular compartments  
277 (nucleus:  $P = 0.044$ , cytosol:  $P = 0.004$ ). In the nucleus (Figure 4A), PGC-1 $\alpha$  was increased at  
278 +3 h compared with Rest during the Pre-HVT (3.1-fold,  $P = 0.002$ ), but not during the Post-HVT  
279 (1.0-fold,  $P = 0.869$ ) biopsy trial. During Pre-HVT, nuclear PGC-1 $\alpha$  was also greater at +3 h

280 compared with Post-HVT (3.1-fold,  $P = 0.015$ ). At Rest, nuclear PGC-1 $\alpha$  protein content was  
281 greater Post-HVT compared with Pre-HVT (1.8-fold,  $P = 0.013$ ).

282 In the cytosol (Figure 4B), PGC-1 $\alpha$  increased compared with Rest both at +0 h (1.8-fold,  $P =$   
283 0.036) and +3 h (2.2-fold,  $P < 0.001$ ) during the Pre-HVT, but not during the Post-HVT (1.1-  
284 fold,  $P = 1.000$  at +0 h; 0.8-fold,  $P = 0.070$  at +3 h) biopsy trial. During the Pre-HVT biopsy  
285 trial, cytosolic PGC-1 $\alpha$  was also greater at +3 h (1.5-fold,  $P = 0.017$ ) compared with the same  
286 time point of the Post-HVT biopsy trial. At Rest, cytosolic PGC-1 $\alpha$  was greater Post-HVT  
287 compared with Pre-HVT (2.0-fold,  $P = 0.005$ ).

288 *Gene expression.* There was an interaction effect for PGC-1 $\alpha$  mRNA content ( $P = 0.020$ ; Figure  
289 5A), which was increased at +3 h compared with Rest during the Pre-HVT (3.6-fold,  $P < 0.001$ ),  
290 but not during the Post-HVT (2.0-fold,  $P = 0.129$ ) biopsy trial. During the Pre-HVT biopsy trial,  
291 the mRNA content of PGC-1 $\alpha$  at +3 h was also greater (1.9-fold,  $P < 0.001$ ) compared with that  
292 recorded at the same time point during the Post-HVT biopsy trial. There was no change in p53  
293 mRNA content throughout (interaction:  $P = 0.425$ ; main effect of exercise:  $P = 0.379$ ; Figure  
294 5B). Results for the mRNA content of *cyt c*, GCN5, HSP70, NRF-1 and NRF-2, PHF20, PPAR $\alpha$ ,  
295 PPAR $\delta$ , PPAR $\gamma$ , SIRT1, and TFAM are reported in Table 2.

296 *Phosphorylation of acetyl-CoA carboxylase (ACC) at serine 79 (p-ACC<sup>Ser79</sup>) protein content.* p-  
297 ACC<sup>Ser79</sup> was not detected in nuclear fractions (Figure 2C). In the cytosol (Figure 6), no  
298 interaction effect was reported ( $P = 0.774$ ); however, there was a main effect of exercise ( $P <$   
299 0.001), whereby p-ACC<sup>Ser79</sup> was greater compared with Rest at +0 h (1.7-fold,  $P < 0.001$ ). Pre-  
300 planned comparisons within biopsy trials indicated that at +0 h cytosolic p-ACC<sup>Ser79</sup> was greater

301 compared with Rest during the Pre-HVT (2.0-fold,  $P = 0.013$ ), but not during the Post-HVT (1.4-  
302 fold,  $P = 0.114$ ) biopsy trial.

303 *p53 protein content.* In the nucleus (Figure 7A), there was an interaction effect ( $P = 0.016$ );  
304 nuclear p53 was increased at +3 h compared with Rest during the Pre-HVT (2.8-fold;  $P = 0.004$ ),  
305 but not during the Post-HVT (1.2-fold,  $P = 0.328$ ) biopsy trial. At Rest, nuclear p53 was greater  
306 Post-HVT compared with Pre-HVT (1.6-fold,  $P = 0.038$ ).

307 In the cytosol (Figure 7B), the interaction effect was not statistically significant ( $P = 0.051$ );  
308 however, there was a main effect of exercise ( $P = 0.003$ ). Cytosolic p53 increased compared with  
309 Rest both at +0 h (1.9-fold,  $P = 0.019$ ) and +3 h (2.2-fold,  $P = 0.004$ ). Pre-planned comparisons  
310 within trials revealed that during the Pre-HVT biopsy trial cytosolic p53 was greater compared  
311 with Rest at both +0 h (2.6-fold,  $P = 0.020$ ) and +3 h (3.2-fold,  $P < 0.001$ ); however, during the  
312 Post-HVT biopsy trial no differences compared with Rest were reported at +0h (1.3-fold,  $P =$   
313 0.440) and +3 h (1.2-fold,  $P = 0.835$ ). At Rest, cytosolic p53 was greater Post-HVT compared  
314 with Pre-HVT (1.9-fold,  $P = 0.015$ ).

315 *PHF20 protein content.* There was an interaction effect in both subcellular compartments  
316 (nucleus:  $P = 0.019$ , cytosol:  $P = 0.025$ ). In the nucleus (Figure 7C), PHF20 increased compared  
317 with Rest both at +0 h (1.7-fold,  $P = 0.016$ ) and +3 h (2.8-fold,  $P < 0.001$ ) during the Pre-HVT,  
318 but not during the Post-HVT (1.3-fold,  $P = 0.616$  at +0 h; 1.3-fold,  $P = 0.858$  at +3 h) biopsy  
319 trial. At Rest, nuclear PHF20 was greater Post-HVT compared with Pre-HVT (1.9-fold,  $P =$   
320 0.004).

321 In the cytosol (Figure 7D), PHF20 increased compared with Rest both at +0 h (1.4-fold,  $P =$   
322 0.032) and +3 h (2.2-fold,  $P < 0.001$ ) during the Pre-HVT, but not during the Post-HVT (1.2-

323 fold,  $P = 0.890$  at +0 h; 1.1-fold,  $P = 0.996$  at +3 h) biopsy trial. At Rest, cytosolic PHF20 was  
324 greater Post-HVT compared with Pre-HVT (1.5-fold,  $P = 0.013$ ).

325 *p-p53<sup>Ser15</sup> protein content*. In the nucleus (Figure 7E), there was an interaction effect ( $P = 0.021$ );  
326 nuclear p-p53<sup>Ser15</sup> was increased compared with Rest at +3 h during the Pre-HVT (2.2-fold;  $P =$   
327 0.001), but not during the Post-HVT (1.3-fold,  $P = 0.970$ ) biopsy trial. At Rest, nuclear p-p53<sup>Ser15</sup>  
328 was greater Post-HVT compared with Pre-HVT (1.5-fold,  $P = 0.043$ )

329 An interaction effect ( $P = 0.033$ ) was also reported in the cytosol (Figure 7F). During Pre-HVT,  
330 cytosolic p-p53<sup>Ser15</sup> was greater compared with Rest at both +0 h (2.8-fold,  $P = 0.018$ ) and +3 h  
331 (3.2-fold,  $P < 0.001$ ), but not during the Post-HVT (1.3-fold,  $P = 0.847$  and 1.1-fold,  $P = 0.997$   
332 at +0 and +3 h, respectively) biopsy trial. At Rest, cytosolic p-p53<sup>Ser15</sup> was greater Post-HVT  
333 compared with Pre-HVT (2.4-fold,  $P = 0.008$ ).

334

## 335 **Discussion**

336 We report that 40 sessions of HIIT resulted in the loss of all measured exercise-induced  
337 molecular changes recorded Pre-HVT. Although training-induced blunting of specific exercise-  
338 induced molecular adaptations in whole cell lysates has previously been reported (48, 49, 55,  
339 69), this is the first study demonstrating training-induced blunting of selected markers of  
340 mitochondrial biogenesis at the subcellular level. Despite exercise-induced increases in both the  
341 nuclear and cytosolic fractions in PGC-1 $\alpha$ , p53, PHF20, and p-p53<sup>Ser15</sup> protein content prior to  
342 the HVT, there were no significant changes in any of these parameters when a session of HIIE  
343 was repeated at the same absolute exercise intensity post training. However, post-HVT there was



344 an increase in resting values of most proteins measured in this study. In contrast to our findings,  
345 where exercise-induced upregulation of all measured parameters was blunted post-training,  
346 previous research has reported that training-induced blunting of exercise-induced molecular  
347 changes is not universal (55, 69). These discrepancies may relate to the much greater number of  
348 training sessions in the present study (40 vs. 7 (55) and 10 (69), respectively).

349 We observed a significant exercise-induced increase in PGC-1 $\alpha$  protein content in both the  
350 nuclear and cytosolic fractions Pre-HVT, consistent with most previous research (24, 33, 43, 44).  
351 However, for the first time we report that these exercise-induced increases were absent post  
352 training in both subcellular fractions. A possible explanation for our findings is that Post-HVT  
353 the relative exercise intensity elicited during the session was lower compared with Pre-HVT  
354 (98.8 vs. 107.4% of  $\dot{W}_{LT}$  for Post- and Pre-HVT, respectively), suggesting that metabolic  
355 perturbations may also have been reduced post-training. This is supported by absence of  
356 significant changes in cytosolic p-ACC<sup>Ser79</sup> Post-HVT (as described more in detail below) It has  
357 been proposed that metabolic perturbations (e.g., increases in intracellular calcium [Ca<sup>2+</sup>],  
358 adenosine monophosphate [AMP] to adenosine triphosphate [ATP] ratio, oxidized nicotinamide  
359 adenine dinucleotide [NAD<sup>+</sup>] to NADH ratio, reactive oxygen species [ROS] production)  
360 provide an important stimulus for exercise-induced mitochondrial biogenesis (17), and promote  
361 an increase in the nuclear content of PGC-1 $\alpha$  protein (73).

362 The reported increase in PGC-1 $\alpha$  protein content in both the nucleus and the cytosol during the  
363 Pre-HVT trial may be attributable, at least in part, to increased protein stability (63). Both p38  
364 mitogen-activated protein kinase (MAPK) (61) and AMP-activated protein kinase (AMPK) (7)  
365 act as signaling proteins that increase PGC-1 $\alpha$  stability via phosphorylation (and they act in  
366 similar fashion to also increase the stability of the p53 protein (39, 67)). Due to the limited

367 amount of enriched lysates obtained during subcellular fractionation, we could not measure  
368 phosphorylation of p38 MAPK and/or AMPK directly. However, due to its molecular weight  
369 (~280 kDa), when blotting for lower molecular weight proteins we were also able to measure p-  
370 ACC<sup>Ser79</sup>, a downstream target and commonly used marker of AMPK activation (9, 10, 38). As  
371 previously reported, p-ACC<sup>Ser79</sup> was not detected in nuclear fractions (24, 44). However, we  
372 were able to measure cytosolic p-ACC<sup>Ser79</sup> and make the novel observation that despite a post-  
373 exercise increase Pre-HVT, there was no significant change Post-HVT. This suggests that  
374 abrogation of AMPK signaling may have contributed to the abrogation of exercise-induced  
375 increases in PGC-1 $\alpha$  (and p53) protein content post-training. Subcellular translocation is another  
376 factor that has been associated with increased PGC-1 $\alpha$  protein content in the nucleus (73). While  
377 our data do not seem to indicate cytosolic/nuclear shuttling of PGC-1 $\alpha$ , protein translocation is a  
378 complex series of cellular processes that cannot be assessed by subcellular fractionation coupled  
379 with the immunoblotting technique (1).

380 PGC-1 $\alpha$  has been shown to be activated via deacetylation by SIRT1 (7, 63). Although previous  
381 research has reported exercise-induced increases in SIRT1 mRNA in human skeletal muscle  
382 following both low-intensity continuous (13) and high intensity interval (15) exercise, our results  
383 indicate a small significant decrease at +0 h (0.8-fold change). SIRT1 activity rather than protein  
384 content seems to regulate mitochondrial biogenesis in humans (27); however, due to limited  
385 tissue availability, we were not able to perform this measurement. It has also been reported that  
386 SIRT1 deacetylase activity may not be required for exercise-induced mitochondrial biogenesis or  
387 PGC-1 $\alpha$  deacetylation, and that changes in the acetyltransferase activity and subcellular location  
388 of GCN5, a negative regulator of PGC-1 $\alpha$  (18), may be more important factors regulating  
389 exercise-induced PGC-1 $\alpha$  activity (57). Consistent with previous findings (15), we report no

390 change in GCN5 mRNA content both Pre- and Post-HVT. Limited skeletal muscle availability  
391 precluded us from assessing GCN5 activity or protein content in different subcellular fractions.  
392 The PGC-1 $\alpha$  protein itself has been reported to stimulate PGC-1 $\alpha$  transcriptional activity via an  
393 autoregulatory loop that requires coactivation of the myocyte enhancer factor-2 protein (30). The  
394 exercise-induced increase in PGC-1 $\alpha$  mRNA content observed Pre-HVT is consistent with  
395 previous findings investigating HIIE (12, 15, 49, 51, 55, 59, 60) and with the notion that  
396 increased nuclear PGC-1 $\alpha$  protein content and stability is associated with greater PGC-1 $\alpha$   
397 transcriptional activity (3). No exercise-induced increase in PGC-1 $\alpha$  mRNA content was  
398 reported Post-HVT, suggesting that 20 days of HVT also blunted the exercise-induced increase  
399 in PGC-1 $\alpha$  transcription. However, previous studies have reported a reduction (rather than  
400 complete loss) of the exercise-induced upregulation of PGC-1 $\alpha$  mRNA content post-training  
401 compared to pre-training when the exercise session was repeated at the same relative (55) or  
402 absolute (49, 69) exercise intensity. This discrepancy may relate to the much greater number of  
403 sessions performed between exercise biopsy trials in our study compared with these three  
404 previous studies (40 vs. 7 to 12, respectively), and a likely greater reduction in the relative  
405 exercise intensity between the Pre- and Post-HVT trials. Moreover, in contrast to the three  
406 previous studies, our participants were habituated to HIIE; this raises the possibility that the  
407 greater molecular response recorded pre-training in the previous studies may be partly  
408 attributable to the “first bout” effect (4, 50).

409 To better characterize the effect of 40 sessions of HIIT on exercise-induced mitochondrial  
410 adaptations to HIIE, we measured the mRNA content of nuclear (NRF-1 and NRF-2 (65)) and  
411 mitochondrial (TFAM (66)) transcription factors regulating mitochondrial biogenesis that are  
412 transcriptionally controlled by PGC-1 $\alpha$  (74). The mRNA content of *cyt c* (a gene under the

413 regulation of PGC-1 $\alpha$  and NRF1 (74)), p53 (a transcriptional regulator of PGC-1 $\alpha$  gene  
414 expression (36)) and PHF20 (a transcription factor that activates p53 gene expression (54)), were  
415 also measured. In addition, we also assessed the mRNA content of three PPAR genes, which are  
416 involved in fatty acid metabolism and transport (19), and HSP70, a chaperone protein required  
417 for the import and folding of mitochondrial proteins (40). Both HSP70 and PPAR $\alpha$  were  
418 increased following exercise during the Pre-HVT trial, but not during the Post-HVT trial,  
419 following a similar response to the majority of the molecular events linked with exercise-induced  
420 mitochondrial biogenesis measured in our study. Aside from a decrease in *cyt c* mRNA content  
421 at +0 h in both HIIE trials, we observed no exercise-induced changes in any of the other genes  
422 either Pre- or Post-HVT. It is important to note that a possible explanation for the lack of  
423 exercise-induced upregulation of some of these mRNAs (at least Pre-HVT) may relate to the  
424 biopsy timings chosen post-exercise, as there is evidence that the exercise-induced upregulation  
425 of some of these genes peaks more than 3 hours post-exercise (8, 12, 16, 21, 29, 54).

426 Similar to our results for PGC-1 $\alpha$  protein, we observed an exercise-induced increase in p53  
427 protein content pre-training in the nuclear and cytosolic fractions - as previously demonstrated  
428 (24, 70). However, this exercise-induced increase in both subcellular fractions was blunted  
429 following 40 training sessions. No other study has investigated exercise-induced changes in p53  
430 protein content pre- and post-training in subcellular fractions. Nonetheless, our results are  
431 consistent with findings showing reduced/blunted exercise-induced mitochondrial adaptations  
432 (e.g., PGC-1 $\alpha$  mRNA, PGC-1 $\alpha$  protein in whole-muscle lysates) when the same exercise session  
433 is repeated post-training both at the same absolute (49, 69) or relative (55) exercise intensity.

434 A possible factor contributing to the lack of exercise-induced changes in nuclear p53 protein  
435 content Post-HVT is that 40 sessions of HIIT increased the resting values of p53 in in both

436 fractions. A second factor relates to a possible decrease in subcellular shuttling (20); however,  
437 simply immunoblotting subcellular enriched fractions for p53 (or PGC-1 $\alpha$ ) protein is not a valid  
438 technique to demonstrate p53 (similar to PGC-1 $\alpha$ ) nuclear/cytosolic shuttling - a process  
439 requiring an intricate and tightly synchronized series of events (20, 47). Nonetheless, a further  
440 novel observation is that there was a concomitant increase in p53 and PHF20 protein content in  
441 both subcellular fractions Pre-HVT, but not Post-HVT. In this regard, PHF20 has been reported  
442 to increase p53 protein stability (53) by disrupting the murine double minute-2 (MDM2)-p53  
443 interaction (11) responsible for p53 protein degradation (32, 53). Although we were not able to  
444 measure the interaction between these two proteins due to limited lysate availability, it is  
445 plausible that our findings may indicate greater p53-PHF20, and reduced p53-MDM2,  
446 interaction Pre- vs Post-HVT.

447 A second important event disrupting the p53-MDM2 interaction and promoting p53 stability is  
448 phosphorylation of p53 at serine 15 (68). Pre-HVT, and consistent with this notion, both nuclear  
449 and cytosolic p-p53<sup>Ser15</sup> increased in parallel with the increase in p53 protein content, as  
450 previously reported (24), suggesting that phosphorylation of p53 at serine 15 may indeed be  
451 involved in the regulation of the p53 protein stability during exercise in human skeletal muscle.  
452 In contrast, we report for the first time that there were no exercise-induced changes in p-p53<sup>Ser15</sup>  
453 in either the nuclear or cytosolic fractions after a period of training (i.e., Post-HVT); the increase  
454 in resting p-p53<sup>Ser15</sup> Post-HVT may be a contributing factor for the lack of exercise-induced  
455 changes in p-p53<sup>Ser15</sup> after 40 sessions of HIIT.

456 This research adds novel information regarding the early molecular events regulating the  
457 exercise-induced mitochondrial adaptations in subcellular fractions and how these are altered by  
458 an exercise training intervention. We provide evidence that 40 sessions of HIIT blunted the

459 exercise-induced increases recorded pre-training in both nuclear and cytosolic-enriched  
460 subcellular fractions, in all of the molecular parameters measured. Although training has  
461 previously been shown to blunt some of the exercise-induced adaptations in whole muscle  
462 lysates (55), this is the first study to report training-induced blunting of protein changes in the  
463 nucleus, where the majority of transcriptional activity takes place, and where an early increase in  
464 PGC-1 $\alpha$  protein content has been reported to constitute the initial phase of the exercise-induced  
465 adaptive response (73). Future studies should investigate if the loss (or reduction) of the  
466 exercise-induced increases in markers of mitochondrial adaptations post-training relates solely to  
467 the decrease in relative exercise intensity, and/or if this is exacerbated by the continuous  
468 repetition of the same exercise stimulus during the training intervention. Well-designed  
469 experiments comparing exercise sessions repeated pre- and post-training at the same relative  
470 exercise intensity and at different time points during the training intervention (even after only 1  
471 or 2 training sessions to determine the role, if any, of the “first bout effect”) should provide  
472 valuable insight into the mechanisms driving this phenomenon.

473 **Acknowledgements**

474 We thank the participants for their time, effort and commitment to this study. The authors would  
475 like to acknowledge Ms. Elise Brentnall and Mr. Maarten Missinne for their valuable help in  
476 data collection and biochemical analyses, respectively.

477 **Author contributions**

478 D. J. Bishop and C. Granata designed the research; C. Granata and R. S. F. Oliveira conducted  
479 the research; C. Granata, R. S. F. Oliveira, J. P. Little, and D. J. Bishop analyzed and interpreted  
480 the data; C. Granata wrote the manuscript; C. Granata, R. S. F. Oliveira, J. P. Little, and D. J.  
481 Bishop critically revised and contributed to the manuscript; C. Granata and D. J. Bishop have  
482 primary responsibility for final content. Data collection took place at Victoria University. Muscle  
483 analysis took place at Victoria University and the University of British Columbia Okanagan. All  
484 persons designated as authors qualify for authorship, and all those qualifying for authorship are  
485 listed. All authors have read and approved the final manuscript.

486 **Conflict of interest**

487 The authors declare no conflict of interest.

488 **Funding**

489 This study was funded by a grant from the ANZ-MASON Foundation provided to DJB and a  
490 Natural Sciences and Engineering Research Council of Canada Discovery Grant to JPL.

491 **References**

- 492 1. **Alberts B, Johnson A, Lewis J, Raff M, Roberts K, and Walter P.** *Molecular Biology*  
493 *of the Cell. 5th edition.* New York, NY: : Garland Science, 2007.
- 494 2. **Andersen CL, Jensen JL, and Ørntoft TF.** Normalization of Real-Time Quantitative  
495 Reverse Transcription-PCR Data: A Model-Based Variance Estimation Approach to Identify  
496 Genes Suited for Normalization, Applied to Bladder and Colon Cancer Data Sets. *Cancer Res*  
497 64: 5245-5250, 2004.
- 498 3. **Anderson RM, Barger JL, Edwards MG, Braun KH, O'Connor CE, Prolla TA, and**  
499 **Weindruch R.** Dynamic regulation of PGC-1 $\alpha$  localization and turnover implicates  
500 mitochondrial adaptation in calorie restriction and the stress response. *Aging Cell* 7: 101-111,  
501 2008.
- 502 4. **Bishop DJ, Botella J, Genders AJ, Lee MJ-C, Saner NJ, Kuang J, Yan X, and**  
503 **Granata C.** High-Intensity Exercise and Mitochondrial Biogenesis: Current Controversies and  
504 Future Research Directions. *Physiology* 34: 56-70, 2019.
- 505 5. **Bishop DJ, Jenkins DG, McEniery M, and Carey MF.** Relationship between plasma  
506 lactate parameters and muscle characteristics in female cyclists. *Med Sci Sports Exerc* 32: 1088-  
507 1093, 2000.
- 508 6. **Booth FW, Gordon SE, Carlson CJ, and Hamilton MT.** Waging war on modern  
509 chronic diseases: primary prevention through exercise biology. *J Appl Physiol* 88: 774-787,  
510 2000.
- 511 7. **Canto C, and Auwerx J.** PGC-1 $\alpha$ , SIRT1 and AMPK, an energy sensing network that  
512 controls energy expenditure. *Curr Opin Lipidol* 20: 98-105, 2009.
- 513 8. **Cartoni R, Léger B, Hock MB, Praz M, Crettenand A, Pich S, Ziltener JL, Luthi F,**  
514 **Dériaz O, Zorzano A, Gobelet C, Kralli A, and Russell AP.** Mitofusins 1/2 and ERR $\alpha$   
515 expression are increased in human skeletal muscle after physical exercise. *J Physiol* 567: 349-  
516 358, 2005.
- 517 9. **Chen Z-P, McConell GK, Michell BJ, Snow RJ, Canny BJ, and Kemp BE.** AMPK  
518 signaling in contracting human skeletal muscle: acetyl-CoA carboxylase and NO synthase  
519 phosphorylation. *American Journal of Physiology-Endocrinology And Metabolism* 279: E1202-  
520 E1206, 2000.



- 521 10. **Chen ZP, Stephens TJ, Murthy S, Canny BJ, Hargreaves M, Witters LA, Kemp BE,**  
522 **and McConell GK.** Effect of exercise intensity on skeletal muscle AMPK signaling in humans.  
523 *Diabetes* 52: 2205-2212, 2003.
- 524 11. **Cui G, Park S, Badeaux AI, Kim D, Lee J, Thompson JR, Yan F, Kaneko S, Yuan**  
525 **Z, Botuyan MV, Bedford MT, Cheng JQ, and Mer G.** PHF20 is an effector protein of p53  
526 double lysine methylation that stabilizes and activates p53. *Nature Structural and Molecular*  
527 *Biology* 19: 916-924, 2012.
- 528 12. **De Filippis E, Alvarez G, Berria R, Cusi K, Everman S, Meyer C, and Mandarino**  
529 **LJ.** Insulin-resistant muscle is exercise resistant: Evidence for reduced response of nuclear-  
530 encoded mitochondrial genes to exercise. *Am J Physiol Endocrinol Metab* 294: E607-E614,  
531 2008.
- 532 13. **Dumke CL, Davis JM, Murphy EA, Nieman DC, Carmichael MD, Quindry JC,**  
533 **Triplett NT, Utter AC, Gross Gowin SJ, Henson DA, McAnulty SR, and McAnulty LS.**  
534 Successive bouts of cycling stimulates genes associated with mitochondrial biogenesis. *Eur J*  
535 *Appl Physiol* 107: 419-427, 2009.
- 536 14. **Eaton M, Granata C, Barry J, Safdar A, Bishop D, and Little JP.** Impact of a single  
537 bout of high-intensity interval exercise and short-term interval training on interleukin-6, FNDC5,  
538 and METRNL mRNA expression in human skeletal muscle. *Journal of Sport and Health Science*  
539 7: 191-196, 2018.
- 540 15. **Edgett BA, Foster WS, Hankinson PB, Simpson CA, Little JP, Graham RB, and**  
541 **Gurd BJ.** Dissociation of increases in PGC-1 $\alpha$  and its regulators from exercise intensity and  
542 muscle activation following acute exercise. *PLoS One* 8: 2013.
- 543 16. **Egan B, O'Connor PL, Zierath JR, and O'Gorman DJ.** Time course analysis reveals  
544 gene-specific transcript and protein kinetics of adaptation to short-term aerobic exercise training  
545 in human skeletal muscle. *PLoS One* 8: 2013.
- 546 17. **Egan B, and Zierath JR.** Exercise metabolism and the molecular regulation of skeletal  
547 muscle adaptation. *Cell Metab* 17: 162-184, 2013.
- 548 18. **Gerhart-Hines Z, Rodgers JT, Bare O, Lerin C, Kim SH, Mostoslavsky R, Alt FW,**  
549 **Wu Z, and Puigserver P.** Metabolic control of muscle mitochondrial function and fatty acid  
550 oxidation through SIRT1/PGC-1 $\alpha$ . *EMBO J* 26: 1913-1923, 2007.

- 551 19. **Gilde A, and Van Bilsen M.** Peroxisome proliferator-activated receptors (PPARS):  
552 regulators of gene expression in heart and skeletal muscle. *Acta Physiol Scand* 178: 425-434,  
553 2003.
- 554 20. **Gottifredi V, and Prives C.** Getting p53 out of the nucleus. *Science* 292: 1851-1852,  
555 2001.
- 556 21. **Granata C, Jamnick NA, and Bishop DJ.** Principles of exercise prescription, and how  
557 they influence exercise-induced changes of transcription factors and other regulators of  
558 mitochondrial biogenesis. *Sports Med* 48: 1541–1559, 2018.
- 559 22. **Granata C, Jamnick NA, and Bishop DJ.** Training-induced changes in mitochondrial  
560 content and respiratory function in human skeletal muscle. *Sports Med* 48: 1809–1828, 2018.
- 561 23. **Granata C, Oliveira RSF, Little JP, Renner K, and Bishop DJ.** Mitochondrial  
562 adaptations to high-volume exercise training are rapidly reversed after a reduction in training  
563 volume in human skeletal muscle. *FASEB J* 30: 3413-3423, 2016.
- 564 24. **Granata C, Oliveira RSF, Little JP, Renner K, and Bishop DJ.** Sprint-interval but not  
565 continuous exercise increases PGC-1 $\alpha$  protein content and p53 phosphorylation in nuclear  
566 fractions of human skeletal muscle. *Sci Rep* 7: 44227, 2017.
- 567 25. **Granata C, Oliveira RSF, Little JP, Renner K, and Bishop DJ.** Training intensity  
568 modulates changes in PGC-1 $\alpha$  and p53 protein content and mitochondrial respiration, but not  
569 markers of mitochondrial content in human skeletal muscle. *FASEB J* 30: 959-970, 2016.
- 570 26. **Groennebaek T, Jespersen NR, Jakobsgaard J, Sieljacks P, Wang J, Rindom E,  
571 Musci R, Bøtker HE, Hamilton KL, and Miller BF.** Skeletal muscle mitochondrial protein  
572 synthesis and respiration increase with low-load blood flow restricted as well as high-load  
573 resistance training. *Front Physiol* 9: 1796, 2018.
- 574 27. **Gurd BJ, Yoshida Y, McFarlan JT, Holloway GP, Moyes CD, Heigenhauser GJF,  
575 Spriet L, and Bonen A.** Nuclear SIRT1 activity, but not protein content, regulates mitochondrial  
576 biogenesis in rat and human skeletal muscle. *Am J Physiol Regul Integr Comp Physiol* 301: R67-  
577 R75, 2011.
- 578 28. **Halsen SL, Bridge MW, Meeusen R, Busschaert B, Gleeson M, Jones DA, and  
579 Jeukendrup AE.** Time course of performance changes and fatigue markers during intensified  
580 training in trained cyclists. *J Appl Physiol* 93: 947-956, 2002.

- 581 29. **Hammond KM, Impey SG, Currell K, Mitchell N, Shepherd SO, Jeromson S,**  
582 **Hawley JA, Close GL, Hamilton LD, Sharples AP, and Morton JP.** Postexercise high-fat  
583 feeding suppresses p70S6K1 activity in human skeletal muscle. *Med Sci Sports Exerc* 48: 2108-  
584 2117, 2016.
- 585 30. **Handschin C, Rhee J, Lin J, Tarr PT, and Spiegelman BM.** An autoregulatory loop  
586 controls peroxisome proliferator-activated receptor  $\gamma$  coactivator 1 $\alpha$  expression in muscle. *Proc*  
587 *Natl Acad Sci U S A* 100: 7111-7116, 2003.
- 588 31. **Handschin C, and Spiegelman BM.** Peroxisome proliferator-activated receptor  $\gamma$   
589 coactivator 1 coactivators, energy homeostasis, and metabolism. *Endocr Rev* 27: 728-735, 2006.
- 590 32. **Haupt Y, Maya R, Kazaz A, and Oren M.** Mdm2 promotes the rapid degradation of  
591 p53. *Nature* 387: 296-299, 1997.
- 592 33. **Heesch MW, Shute RJ, Kreiling JL, and Slivka DR.** Transcriptional control, but not  
593 subcellular location, of PGC-1 $\alpha$  is altered following exercise in a hot environment. *J Appl*  
594 *Physiol* 121: 741-749, 2016.
- 595 34. **Holloszy JO.** Biochemical adaptations in muscle. Effects of exercise on mitochondrial  
596 oxygen uptake and respiratory enzyme activity in skeletal muscle. *J Biol Chem* 242: 2278-2282,  
597 1967.
- 598 35. **Hood DA.** Mechanisms of exercise-induced mitochondrial biogenesis in skeletal muscle.  
599 *Appl Physiol Nutr Metab* 34: 465-472, 2009.
- 600 36. **Irrcher I, Ljubcic V, Kirwan AF, and Hood DA.** AMP-activated protein kinase-  
601 regulated activation of the PGC-1 $\alpha$  promoter in skeletal muscle cells. *PLoS One* 3: 2008.
- 602 37. **Jacobs RA, and Lundby C.** Mitochondria express enhanced quality as well as quantity  
603 in association with aerobic fitness across recreationally active individuals up to elite athletes. *J*  
604 *Appl Physiol* 114: 344-350, 2013.
- 605 38. **Jäger S, Handschin C, St-Pierre J, and Spiegelman BM.** AMP-activated protein  
606 kinase (AMPK) action in skeletal muscle via direct phosphorylation of PGC-1 $\alpha$ . *Proc Natl Acad*  
607 *Sci USA* 104: 12017-12022, 2007.
- 608 39. **Jones RG, Plas DR, Kubek S, Buzzai M, Mu J, Xu Y, Birnbaum MJ, and Thompson**  
609 **CB.** AMP-activated protein kinase induces a p53-dependent metabolic checkpoint. *Mol Cell* 18:  
610 283-293, 2005.

- 611 40. **Kang HM, Ahn SH, Choi P, Ko Y-A, Han SH, Chinga F, Park ASD, Tao J, Sharma**  
612 **K, and Pullman J.** Defective fatty acid oxidation in renal tubular epithelial cells has a key role  
613 in kidney fibrosis development. *Nat Med* 21: 37, 2015.
- 614 41. **Kuang J, Yan X, Genders AJ, Granata C, and Bishop DJ.** An overview of technical  
615 considerations when using quantitative real-time PCR analysis of gene expression in human  
616 exercise research. *PLoS One* 13: e0196438, 2018.
- 617 42. **Laursen PB, and Jenkins DG.** The scientific basis for high-intensity interval training:  
618 Optimising training programmes and maximising performance in highly trained endurance  
619 athletes. *Sports Med* 32: 53-73, 2002.
- 620 43. **Little JP, Safdar A, Bishop D, Tarnopolsky MA, and Gibala MJ.** An acute bout of  
621 high-intensity interval training increases the nuclear abundance of PGC-1alpha and activates  
622 mitochondrial biogenesis in human skeletal muscle. *Am J Physiol Regul Integr Comp Physiol*  
623 300: R1303-1310, 2011.
- 624 44. **Little JP, Safdar A, Cermak N, Tarnopolsky MA, and Gibala MJ.** Acute endurance  
625 exercise increases the nuclear abundance of PGC-1 $\alpha$  in trained human skeletal muscle. *Am J*  
626 *Physiol Endocrinol Metab* 298: R912-R917, 2010.
- 627 45. **Londeree BR.** Effect of training on lactate/ventilatory thresholds: A meta-analysis. *Med*  
628 *Sci Sports Exerc* 29: 837-843, 1997.
- 629 46. **Luft R.** The development of mitochondrial medicine. *Proc Natl Acad Sci USA* 91: 8731-  
630 8738, 1994.
- 631 47. **Marchenko ND, Hanel W, Li D, Becker K, Reich N, and Moll UM.** Stress-mediated  
632 nuclear stabilization of p53 is regulated by ubiquitination and importin- $\alpha$ 3 binding. *Cell Death*  
633 *Differ* 17: 255-267, 2010.
- 634 48. **McConnell GK, Lee-Young RS, Chen ZP, Stepto NK, Huynh NN, Stephens TJ,**  
635 **Canny BJ, and Kemp BE.** Short-term exercise training in humans reduces AMPK signalling  
636 during prolonged exercise independent of muscle glycogen. *The Journal of physiology* 568: 665-  
637 676, 2005.
- 638 49. **Morrison D, Hughes J, Della Gatta PA, Mason S, Lamon S, Russell AP, and Wadley**  
639 **GD.** Vitamin C and E supplementation prevents some of the cellular adaptations to endurance-  
640 training in humans. *Free Radic Biol Med* 89: 852-862, 2015.

- 641 50. **Murton AJ, Billeter R, Stephens FB, Des Etages SG, Graber F, Hill RJ, Marimuthu**  
642 **K, and Greenhaff PL.** Transient transcriptional events in human skeletal muscle at the outset of  
643 concentric resistance exercise training. *J Appl Physiol* 116: 113-125, 2013.
- 644 51. **Nordsborg NB, Lundby C, Leick L, and Pilegaard H.** Relative workload determines  
645 exercise-induced increases in PGC-1 $\alpha$  mRNA. *Med Sci Sports Exerc* 42: 1477-1484, 2010.
- 646 52. **Nunnari J, and Suomalainen A.** Mitochondria: in sickness and in health. *Cell* 148:  
647 1145-1159, 2012.
- 648 53. **Oren M.** Regulation of the p53 tumor suppressor protein. *J Biol Chem* 274: 36031-  
649 36034, 1999.
- 650 54. **Park S, Kim D, Dan HC, Chen H, Testa JR, and Cheng JQ.** Identification of Akt  
651 interaction protein PHF20/TZP that transcriptionally regulates p53. *J Biol Chem* 287: 11151-  
652 11163, 2012.
- 653 55. **Perry CGR, Lally J, Holloway GP, Heigenhauser GJF, Bonen A, and Spriet LL.**  
654 Repeated transient mRNA bursts precede increases in transcriptional and mitochondrial proteins  
655 during training in human skeletal muscle. *J Physiol* 588: 4795-4810, 2010.
- 656 56. **Pfaffl MW, Tichopad A, Prgomet C, and Neuvians TP.** Determination of stable  
657 housekeeping genes, differentially regulated target genes and sample integrity: BestKeeper -  
658 Excel-based tool using pair-wise correlations. *Biotechnol Lett* 26: 509-515, 2004.
- 659 57. **Philp A, Chen A, Lan D, Meyer GA, Murphy AN, Knapp AE, Olfert IM, McCurdy**  
660 **CE, Marcotte GR, Hogan MC, Baar K, and Schenk S.** Sirtuin 1 (SIRT1) deacetylase activity  
661 is not required for mitochondrial biogenesis or peroxisome proliferator-activated receptor- $\gamma$   
662 coactivator-1 $\alpha$  (PGC-1 $\alpha$ ) deacetylation following endurance exercise. *J Biol Chem* 286: 30561-  
663 30570, 2011.
- 664 58. **Pilegaard H, Saltin B, and Neufer DP.** Exercise induces transient transcriptional  
665 activation of the PGC-1 $\alpha$  gene in human skeletal muscle. *J Physiol* 546: 851-858, 2003.
- 666 59. **Popov D, Zinovkin R, Karger E, Tarasova O, and Vinogradova O.** Effects of  
667 continuous and intermittent aerobic exercise upon mRNA expression of metabolic genes in  
668 human skeletal muscle. *J Sports Med Phys Fitness* 54: 362-369, 2014.
- 669 60. **Popov DV, Zinovkin RA, Karger EM, Tarasova OS, and Vinogradova OL.** The  
670 effect of aerobic exercise on the expression of genes in skeletal muscles of trained and untrained  
671 men. *Hum Physiol* 39: 190-195, 2013.

- 672 61. **Puigserver P, Rhee J, Lin J, Wu Z, Yoon JC, Zhang CY, Krauss S, Mootha VK,**  
673 **Lowell BB, and Spiegelman BM.** Cytokine Stimulation of Energy Expenditure through p38  
674 MAP Kinase Activation of PPAR $\gamma$  Coactivator-1. *Mol Cell* 8: 971-982, 2001.
- 675 62. **Puigserver P, and Spiegelman BM.** Peroxisome proliferator-activated receptor- $\gamma$   
676 coactivator 1 $\alpha$  (PGC-1 $\alpha$ ): Transcriptional coactivator and metabolic regulator. *Endocr Rev* 24:  
677 78-90, 2003.
- 678 63. **Rodgers JT, Lerin C, Gerhart-Hines Z, and Puigserver P.** Metabolic adaptations  
679 through the PGC-1 $\alpha$  and SIRT1 pathways. *FEBS Lett* 582: 46-53, 2008.
- 680 64. **Saleem A, Carter HN, Iqbal S, and Hood DA.** Role of p53 within the regulatory  
681 network controlling muscle mitochondrial biogenesis. *Exerc Sport Sci Rev* 39: 199-205, 2011.
- 682 65. **Scarpulla RC.** Nuclear activators and coactivators in mammalian mitochondrial  
683 biogenesis. *Biochim Biophys Acta, Gene Struct Expression* 1576: 1-14, 2002.
- 684 66. **Scarpulla RC.** Transcriptional paradigms in mammalian mitochondrial biogenesis and  
685 function. *Physiol Rev* 88: 611-638, 2008.
- 686 67. **She QB, Bode AM, Ma WY, Chen NY, and Dong Z.** Resveratrol-induced activation of  
687 p53 and apoptosis is mediated by extracellular-signal-regulated protein kinases and p38 kinase.  
688 *Cancer Res* 61: 1604-1610, 2001.
- 689 68. **Shieh SY, Ikeda M, Taya Y, and Prives C.** DNA damage-induced phosphorylation of  
690 p53 alleviates inhibition by MDM2. *Cell* 91: 325-334, 1997.
- 691 69. **Stepito NK, Benziane B, Wadley GD, Chibalin AV, Canny BJ, Eynon N, and**  
692 **McConnell GK.** Short-term intensified cycle training alters acute and chronic responses of  
693 PGC1 $\alpha$  and cytochrome c oxidase IV to exercise in human skeletal muscle. *PLoS One* 7: 2012.
- 694 70. **Tachtsis B, Smiles W, Lane S, Hawley J, and Camera DM.** Acute endurance exercises  
695 induces nuclear p53 abundance in human skeletal muscle. *Front Physiol* 7: 2016.
- 696 71. **Welinder C, and Ekblad L.** Coomassie staining as loading control in Western blot  
697 analysis. *J Proteome Res* 10: 1416-1419, 2011.
- 698 72. **Wilkinson DJ, Franchi MV, Brook MS, Narici MV, Williams JP, Mitchell WK,**  
699 **Szewczyk NJ, Greenhaff PL, Atherton PJ, and Smith K.** A validation of the application of  
700 D2O stable isotope tracer techniques for monitoring day-to-day changes in muscle protein sub-  
701 fraction synthesis in humans. *American Journal of Physiology-Heart and Circulatory Physiology*  
702 2014.

- 703 73. **Wright DC, Han DH, Garcia-Roves PM, Geiger PC, Jones TE, and Holloszy JO.**  
704 Exercise-induced mitochondrial biogenesis begins before the increase in muscle PGC-1 $\alpha$   
705 expression. *J Biol Chem* 282: 194-199, 2007.
- 706 74. **Wu Z, Puigserver P, Andersson U, Zhang C, Adelmant G, Mootha V, Troy A, Cinti**  
707 **S, Lowell B, Scarpulla RC, and Spiegelman BM.** Mechanisms controlling mitochondrial  
708 biogenesis and respiration through the thermogenic coactivator PGC-1. *Cell* 98: 115-124, 1999.
- 709



710 **Figure legends**

711 Figure 1. **Study design.** Grey rectangles indicate a HIIE session; grey triangles within HVT  
712 indicate a 10-km cycling time trial; each rectangle and/or vertical pair of rectangles and/or  
713 vertical pair of rectangles and triangles represents a training day; arrows indicate a skeletal  
714 muscle biopsy. Each test in both the Pre- and Post-HVT phase was separated by 48 to 72 hours.  
715 20k-TT: 20-km cycling time trial; GXT: graded exercise test; HIIE: high-intensity interval  
716 exercise; Rest: skeletal muscle biopsy at rest; +0 h: skeletal muscle biopsy taken at the end of the  
717 HIIE session; +3 h: skeletal muscle biopsy taken three hours after the completion of the HIIE  
718 session.

719 Figure 2. **Representative immunoblots, subcellular enrichment and protein loading**  
720 **controls.** (a) Representative immunoblots of peroxisome proliferator-activated receptor  $\gamma$   
721 coactivator-1 $\alpha$  (PGC-1 $\alpha$ ), acetyl-CoA carboxylase phosphorylated at serine 79 (p-ACC<sup>Ser79</sup>),  
722 p53, plant homeodomain finger-containing protein 20 (PHF20), and p53 phosphorylated at serine  
723 15 (p-p53<sup>Ser15</sup>) measured in the nuclear and cytosolic fractions obtained from human vastus  
724 lateralis muscle biopsies, before (Rest), immediately post (+0 h), and 3 h (+3 h) after a single  
725 session of high-intensity interval exercise (HIIE) performed at the same absolute intensity before  
726 (Pre-HVT) and after (Post-HVT) 40 sessions of twice-daily high-volume high-intensity interval  
727 training (HVT). PHF20: top band at ~105 kDa. No band was detected in the nuclear fractions for  
728 p-ACC<sup>Ser79</sup>. (b) Histone H3 and lactate dehydrogenase A (LDHA) were used as indicators of  
729 cytosolic and nuclear enrichment, respectively. N: nuclear fractions; C: cytosolic fractions. (c)  
730 Whole-lane Coomassie blue staining for both nuclear and cytosolic fractions was used to verify  
731 equal loading between lanes. The immunoblot and whole-lane Coomassie images in this figure  
732 were cropped to improve the conciseness and clarity of the presentation.



733 Figure 3. **Power attained at the lactate threshold ( $\dot{W}_{LT}$ ), peak power achieved during the**  
734 **graded exercise test ( $\dot{W}_{peak}$ ), and mean power of the Pre- and Post-HVT high-intensity**  
735 **interval exercise (HIIE) biopsy trials.**  $\dot{W}_{LT}$  and  $\dot{W}_{peak}$  were assessed before (Pre-HVT) and  
736 after (Post-HVT) 40 sessions of twice-daily high-volume high-intensity interval training (HVT).  
737 Open circles (Pre-HVT) and open diamonds (Post-HVT) represent individual values; white (Pre-  
738 HVT) and grey (Post-HVT) bars represent mean values; the dotted line represents the mean  
739 power during the Pre- and Post-HVT HIIE biopsy trials.  $n = 9$ .  $^{\$} P < 0.05$  vs. Pre-HVT Rest by  
740 paired t-test.

741 Figure 4. **Peroxisome proliferator-activated receptor  $\gamma$  coactivator-1 $\alpha$  (PGC-1 $\alpha$ ) protein.**  
742 Protein content of PGC-1 $\alpha$  in nuclear (a), and cytosolic (b) sub fractions before (Rest),  
743 immediately post (+0 h), and 3 h (+3 h) after a single session of high-intensity interval exercise  
744 (HIIE) performed at the same absolute intensity before (Pre-HVT) and (Post-HVT) 40 sessions  
745 of twice-daily high-volume high-intensity interval training (HVT), in the vastus lateralis muscle  
746 of young healthy men ( $n = 9$ ). Open circles (Pre-HVT) and open diamonds (Post-HVT)  
747 represent individual values; white (Pre-HVT) and grey (Post-HVT) bars represent mean values. \*  
748  $P < 0.05$  vs. Rest of the same group;  $^{\dagger} P < 0.05$  vs. same time point of Post-HVT trial by two-  
749 way ANOVA with repeated measures followed by Tukey's honestly significant difference post-  
750 hoc test, or pre-planned paired t-test for Rest values between trials. To more clearly depict fold-  
751 changes in post-exercise values from potentially different Rest values in the untrained and  
752 trained state, an inset has been added to each main figure (note, significant differences between  
753 trained and untrained values at Rest are not reported in insets as these values are both normalized  
754 to 1); the error bars represent the standard error of the mean (SEM).

755 **Figure 5. Gene expression in whole tissue.** mRNA content of peroxisome proliferator-activated  
756 receptor  $\gamma$  coactivator-1 $\alpha$  (PGC-1 $\alpha$ ) (a), and p53 (b) before (Rest), immediately post (+0 h), and  
757 3 h (+3 h) after a single session of high-intensity interval exercise (HIIE) performed at the same  
758 absolute intensity before (Pre-HVT) and after (Post-HVT) 40 sessions of twice-daily high-  
759 volume high-intensity interval training (HVT), in the vastus lateralis muscle of young healthy  
760 men (n = 9). Values are expressed relative to TATA-binding protein (TBP), glyceraldehyde 3-  
761 phosphate dehydrogenase (GAPDH), and  $\beta$ -actin (ACTB) housekeeping genes (Ctrl in the  
762 figure). Open circles (Pre-HVT) and open diamonds (Post-HVT) represent individual values;  
763 white (Pre-HVT) and grey (Post-HVT) bars represent mean values. \*  $P < 0.05$  vs. Rest of the  
764 same group; †  $P < 0.05$  vs. same time point of Post-HVT trial by two-way ANOVA with repeated  
765 measures followed by Tukey's honestly significant difference post-hoc test, or by pre-planned  
766 paired t-test for Rest values between trials. To more clearly depict fold-changes in post-exercise  
767 values from potentially different Rest values in the untrained and trained state, an inset has been  
768 added to each main figure; the error bars represent the SEM.

769 **Figure 6. Phosphorylation of acetyl-CoA carboxylase (ACC) at serine 79 (p-ACC<sup>Ser79</sup>).**  
770 Protein content of cytosolic p-ACC<sup>Ser79</sup> before (Rest), immediately post (+0 h), and 3 h (+3 h)  
771 after a single session of high-intensity interval exercise (HIIE) performed at the same absolute  
772 intensity before (Pre-HVT) and after (Post-HVT) 40 sessions of twice-daily high-volume high-  
773 intensity interval training (HVT), in the vastus lateralis muscle of young healthy men (n = 9).  
774 Open circles (Pre-HVT) and open diamonds (Post-HVT) represent individual values; white (Pre-  
775 HVT) and grey (Post-HVT) bars represent mean values. # main effect of exercise ( $P < 0.05$ ) vs.  
776 Rest; \*  $P < 0.05$  vs. Rest of the same group by two-way ANOVA with repeated measures  
777 followed by Tukey's honestly significant difference post-hoc test, or by pre-planned paired t-test

778 for Rest values between trials. To more clearly depict fold-changes in post-exercise values from  
779 potentially different Rest values in the untrained and trained state, an inset has been added to  
780 each main figure; the error bars represent the SEM.

781 **Figure 7. p53 and plant homeodomain finger-containing protein 20 (PHF20) protein.** Protein  
782 content of nuclear (a) and cytosolic (b) p53, of nuclear (c) and cytosolic (d) PHF20, and of  
783 nuclear (e) and cytosolic (f) p-p53<sup>Ser15</sup> assessed before (Rest), immediately post (+0 h), and 3 h  
784 (+3 h) after a single session of high-intensity interval exercise (HIIE) performed at the same  
785 absolute intensity before (Pre-HVT) and after (Post-HVT) 40 sessions of twice-daily high-  
786 volume high-intensity interval training (HVT), in the vastus lateralis muscle of young healthy  
787 men (n = 9). Open circles (Pre-HVT) and open diamonds (Post-HVT) represent individual  
788 values; white (Pre-HVT) and grey (Post-HVT) bars represent mean values. # main effect of  
789 exercise ( $P < 0.05$ ) vs. Rest; \*  $P < 0.05$  vs. Rest of the same group; †  $P < 0.05$  vs. same time point  
790 of Post-HVT trial by two-way ANOVA with repeated measures followed by Tukey's honestly  
791 significant difference post-hoc test, or by pre-planned paired t-test for Rest values between trials.  
792 To more clearly depict fold-changes in post-exercise values from potentially different Rest  
793 values in the untrained and trained state, an inset has been added to each main figure (note,  
794 significant differences between trained and untrained values at Rest are not reported in insets as  
795 these values are both normalized to 1); the error bars represent the SEM.

796 **Tables**

797 Table 1. Primers used for real-time PCR analyses of mRNA expression.

| <b>Gene</b>    | <b>Primer efficiency</b> | <b>Forward primer (5'→3')</b> | <b>Reverse primer (5'→3')</b> |
|----------------|--------------------------|-------------------------------|-------------------------------|
| ACTB           | 107%                     | GAGCACAGAGCCTCGCCTTT          | TCATCATCCATGGTGAGCTGGC        |
| B2M            | 98%                      | TGCTGTCTCCATGTTTGATGTATCT     | TCTCTGCTCCCCACCTCTAAGT        |
| <i>cyt c</i>   | 98.8%                    | GGGCCAAATCTCCATGGTCT          | TCTCCCCAGATGATGCCTTT          |
| GAPDH          | 106%                     | AATCCCATCACCATCTTCCA          | TGGACTCCACGACGTACTCA          |
| HSPA1A         | 99%                      | GGGCCTTTCCAAGATTGCTG          | GGTGGGTCCCATAACCCCTTG         |
| KAT2A          | 95%                      | TGACCCGAAGCACAAGACTC          | GGTGGGTCCCATAACCCCTTG         |
| NRF-1          | 80.7%                    | CTACTCGTGTGGGACAGCAA          | AGCAGACTCCAGGTCTTCCA          |
| NRF-2          | 92%                      | AAGTGACAAGATGGGCTGCT          | TGGACCACTGTATGGGATCA          |
| p53            | 101.8%                   | GTTCCGAGAGCTGAATGAGG          | TTATGGCGGGAGGTAGACTG          |
| PGC-1 $\alpha$ | 103.6%                   | GGCAGAAGGCAATTGAAGAG          | TCAAAACGGTCCCTCAGTTC          |
| PHF20          | 117.5%                   | GTGGGGCCGTGAGGAGAATA          | AACTGGGCTCCCACCTTCAAA         |
| PPAR $\alpha$  | 92.7%                    | GGCAGAAGAGCCGTCTCTACTTA       | TTTGCATGGTTCTGGGTACTGA        |
| PPAR $\delta$  | 109%                     | CATCATTCTGTGTGGAGACCG         | AGAGGTACTGGGCATCAGGG          |
| PPAR $\gamma$  | 103.7%                   | CTTGTGAAGGATGCAAGGGTT         | GAGACATCCCCACTGCAAGG          |
| SIRT1          | 99.5%                    | ACGCTGGAACAGGTTGCGGGA         | AAGCGGTTTCATCAGCTGGGCAC       |
| TBP            | 99%                      | CAGTGACCCAGCAGCATCACT         | AGGCCAAGCCCTGAGCGTAA          |
| TFAM           | 109.3%                   | CCGAGGTGGTTTTTCATCTGT         | GCATCTGGGTTCTGAGCTTT          |

798 ACTB,  $\beta$ -actin; B2M, beta-2-microglobulin; *cyt c*, cytochrome *c*; GAPDH, glyceraldehyde 3-  
799 phosphate dehydrogenase; HSPA1A, heat shock 70 kDa protein 1A (HSP70); KAT2A, histone  
800 acetyltransferase KAT2A (GCN5); NRF1, nuclear respiratory factor 1; NRF2, nuclear  
801 respiratory factor 2; PGC-1 $\alpha$ , peroxisome proliferator-activated receptor  $\gamma$  coactivator-1 $\alpha$ ;  
802 PHF20, plant homeodomain finger-containing protein 20; PPAR $\alpha$ , peroxisome proliferator-

- 803 activated receptor alpha; PPAR $\delta$ , peroxisome proliferator-activated receptor delta; PPAR $\gamma$ ,  
804 peroxisome proliferator-activated receptor gamma; SIRT1, NAD-dependent protein deacetylase  
805 sirtuin-1; TBP, TATA-binding protein; TFAM, mitochondrial transcription factor A.

806 Table 2. mRNA content measured in whole tissue of cytochrome *c* (cyt *c*), histone  
 807 acetyltransferase KAT2A (GCN5), heat shock 70 kDa protein 1A (HSP70), nuclear respiratory factor 1  
 808 (NRF-1) and 2 (NRF-2), plant homeodomain finger-containing protein 20 (PHF20), peroxisome  
 809 proliferator-activated receptor alpha (PPAR $\alpha$ ), peroxisome proliferator-activated receptor delta (PPAR $\delta$ ),  
 810 peroxisome proliferator-activated receptor gamma (PPAR $\gamma$ ), NAD-dependent protein deacetylase sirtuin-  
 811 1 (SIRT1), and mitochondrial transcription factor A (TFAM) measured immediately post (+0 h)  
 812 and 3 h (+3 h) after a single session of high-intensity interval exercise (HIIE) performed at the  
 813 same absolute intensity before (Pre-HVT) and after (Post-HVT) 40 sessions of twice-daily high-  
 814 volume high-intensity interval training (HVT), in the vastus lateralis muscle of young healthy  
 815 men. Values are expressed relative to TATA-binding protein (TBP), glyceraldehyde 3-phosphate  
 816 dehydrogenase (GAPDH), and  $\beta$ -actin (ACTB) housekeeping genes.

| Gene         | Interaction      | Time Point        | Pre-HVT                    | Post-HVT        |
|--------------|------------------|-------------------|----------------------------|-----------------|
| cyt <i>c</i> | $P = 0.079$      | Rest              | $2.06 \pm 0.89$            | $2.79 \pm 1.55$ |
|              |                  | +0 h <sup>#</sup> | $1.63 \pm 0.44$            | $1.46 \pm 0.67$ |
|              |                  | +3 h              | $1.70 \pm 0.64$            | $2.48 \pm 1.37$ |
| GCN5         | $P = 0.718$      | Rest              | $0.05 \pm 0.06$            | $0.09 \pm 0.15$ |
|              |                  | +0 h              | $0.06 \pm 0.04$            | $0.08 \pm 0.07$ |
|              |                  | +3 h              | $0.06 \pm 0.08$            | $0.13 \pm 0.14$ |
| HSP70        | $P = 0.021^{\$}$ | Rest              | $1.15 \pm 0.84$            | $1.98 \pm 1.43$ |
|              |                  | +0 h              | $4.49 \pm 3.01^{*\dagger}$ | $2.00 \pm 0.84$ |
|              |                  | +3 h              | $3.87 \pm 1.81^*$          | $2.63 \pm 1.11$ |
| NRF-1        | $P = 0.118$      | Rest              | $0.14 \pm 0.08$            | $0.13 \pm 0.06$ |
|              |                  | +0 h              | $0.19 \pm 0.09$            | $0.14 \pm 0.04$ |
|              |                  | +3 h              | $0.15 \pm 0.05$            | $0.16 \pm 0.05$ |
| NRF-2        | $P = 0.962$      | Rest              | $0.23 \pm 0.07$            | $0.21 \pm 0.06$ |
|              |                  | +0 h              | $0.23 \pm 0.09$            | $0.19 \pm 0.05$ |
|              |                  | +3 h              | $0.28 \pm 0.13$            | $0.26 \pm 0.15$ |

|               |                  |                   |                            |                 |
|---------------|------------------|-------------------|----------------------------|-----------------|
| PHF20         | $P = 0.279$      | Rest              | $0.34 \pm 0.08$            | $0.27 \pm 0.04$ |
|               |                  | +0 h              | $0.31 \pm 0.08$            | $0.24 \pm 0.05$ |
|               |                  | +3 h              | $0.31 \pm 0.09$            | $0.29 \pm 0.09$ |
| PPAR $\alpha$ | $P = 0.005^{\S}$ | Rest              | $0.43 \pm 0.20$            | $0.61 \pm 0.38$ |
|               |                  | +0 h              | $0.27 \pm 0.19$            | $0.31 \pm 0.08$ |
|               |                  | +3 h              | $1.66 \pm 0.91^{*\dagger}$ | $0.87 \pm 0.40$ |
| PPAR $\delta$ | $P = 0.766$      | Rest              | $0.00 \pm 0.00$            | $0.01 \pm 0.03$ |
|               |                  | +0 h              | $0.01 \pm 0.01$            | $0.01 \pm 0.02$ |
|               |                  | +3 h              | $0.02 \pm 0.04$            | $0.02 \pm 0.02$ |
| PPAR $\gamma$ | $P = 0.096$      | Rest              | $0.06 \pm 0.02^{\dagger}$  | $0.08 \pm 0.03$ |
|               |                  | +0 h              | $0.04 \pm 0.02$            | $0.05 \pm 0.02$ |
|               |                  | +3 h              | $0.04 \pm 0.02$            | $0.11 \pm 0.11$ |
| SIRT1         | $P = 0.685$      | Rest              | $0.06 \pm 0.03$            | $0.07 \pm 0.04$ |
|               |                  | +0 h <sup>#</sup> | $0.05 \pm 0.03$            | $0.05 \pm 0.02$ |
|               |                  | +3 h              | $0.07 \pm 0.02$            | $0.06 \pm 0.04$ |
| TFAM          | $P = 0.953$      | Rest              | $0.48 \pm 0.14$            | $0.44 \pm 0.09$ |
|               |                  | +0 h              | $0.40 \pm 0.11$            | $0.37 \pm 0.08$ |
|               |                  | +3 h              | $0.47 \pm 0.13$            | $0.44 \pm 0.12$ |

817 <sup>§</sup> Interaction effect ( $P < 0.05$ ), <sup>#</sup> main effect of exercise ( $P < 0.05$ ) vs. Rest, \*  $P < 0.05$  vs. Rest of  
818 the same group, <sup>†</sup>  $P < 0.05$  vs. same time point of Post-HVT trial, by two-way ANOVA with  
819 repeated measures followed by Tukey's honestly significant difference post-hoc test, or pre-  
820 planned paired t-test for Rest values between trials. All values are mean  $\pm$  SD. n = 9 for NRF1; n  
821 = 7 for PHF20; n = 8 for all other genes.

4 weeks of  
normal-volume training  
(NVT)

Pre-HVT

20 days of  
high-volume training  
(HVT)

Post-HVT

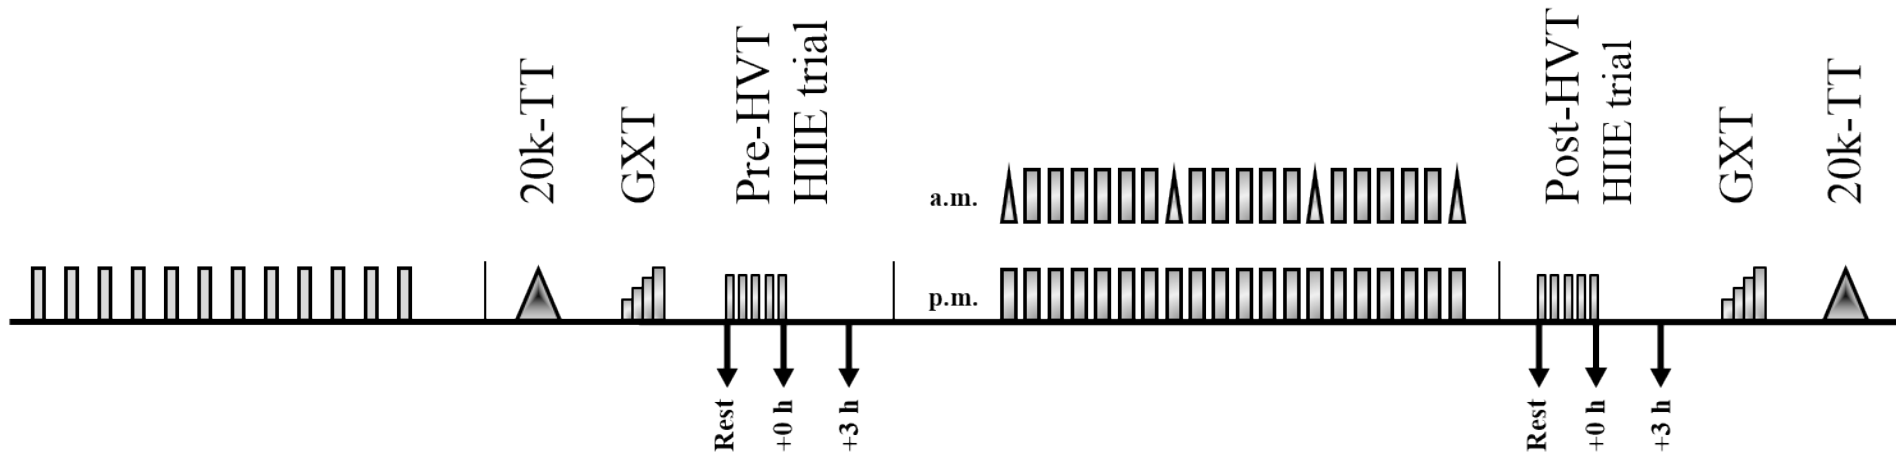



A

bioRxiv preprint doi: <https://doi.org/10.1101/580373>; this version posted October 11, 2019. The copyright holder for this preprint (which was not certified by peer review) is the author/funder. All rights reserved. No reuse allowed without permission.

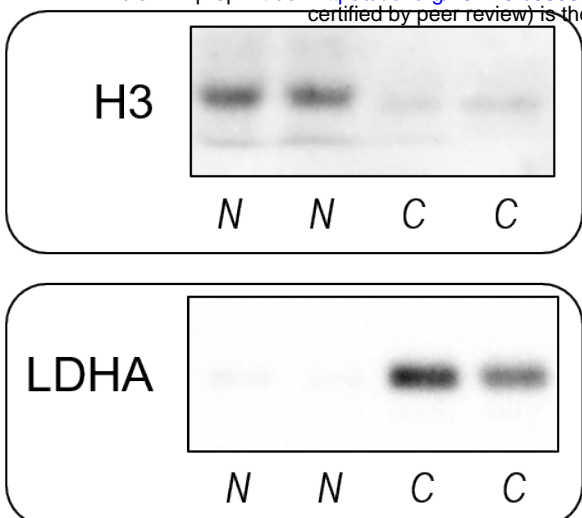

B

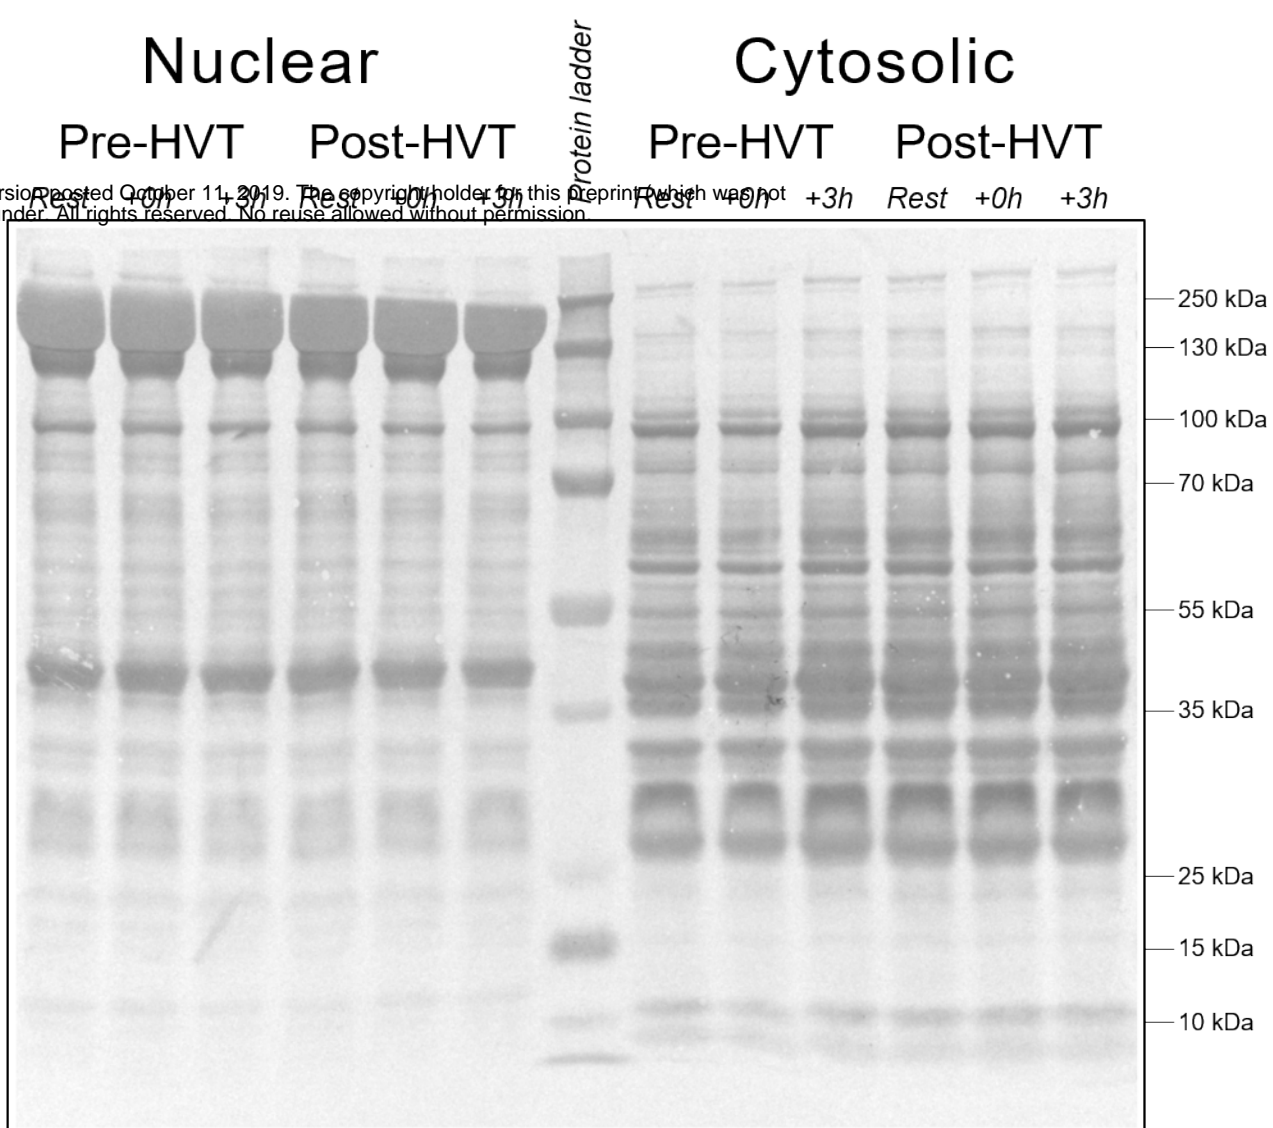

C

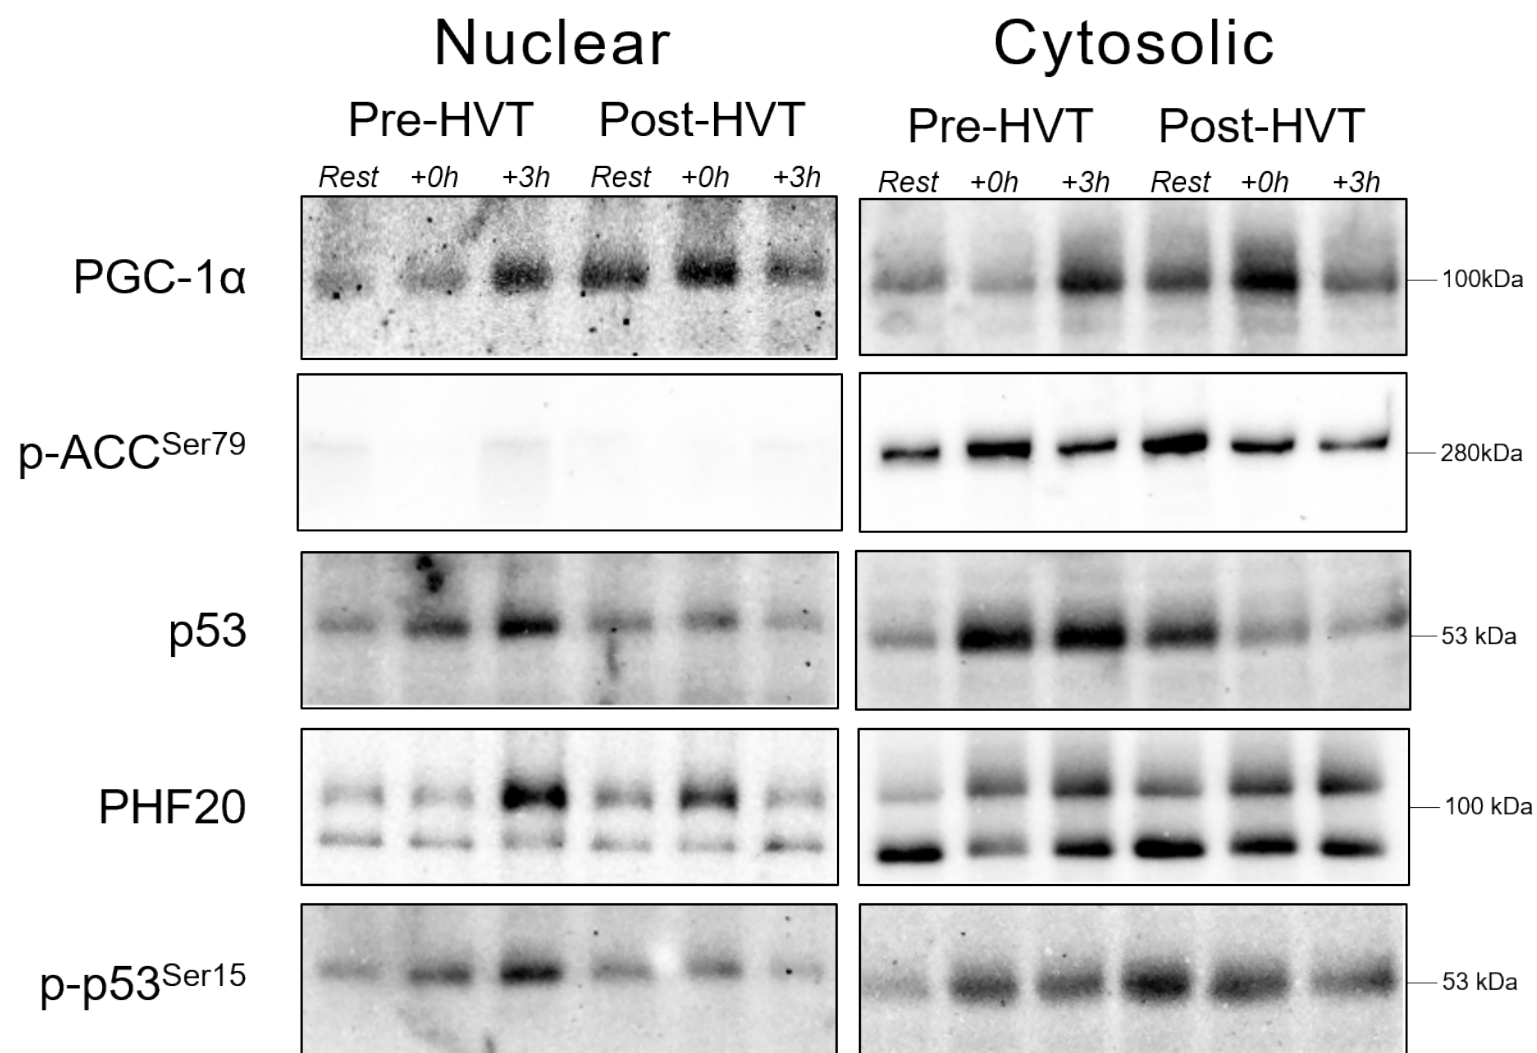

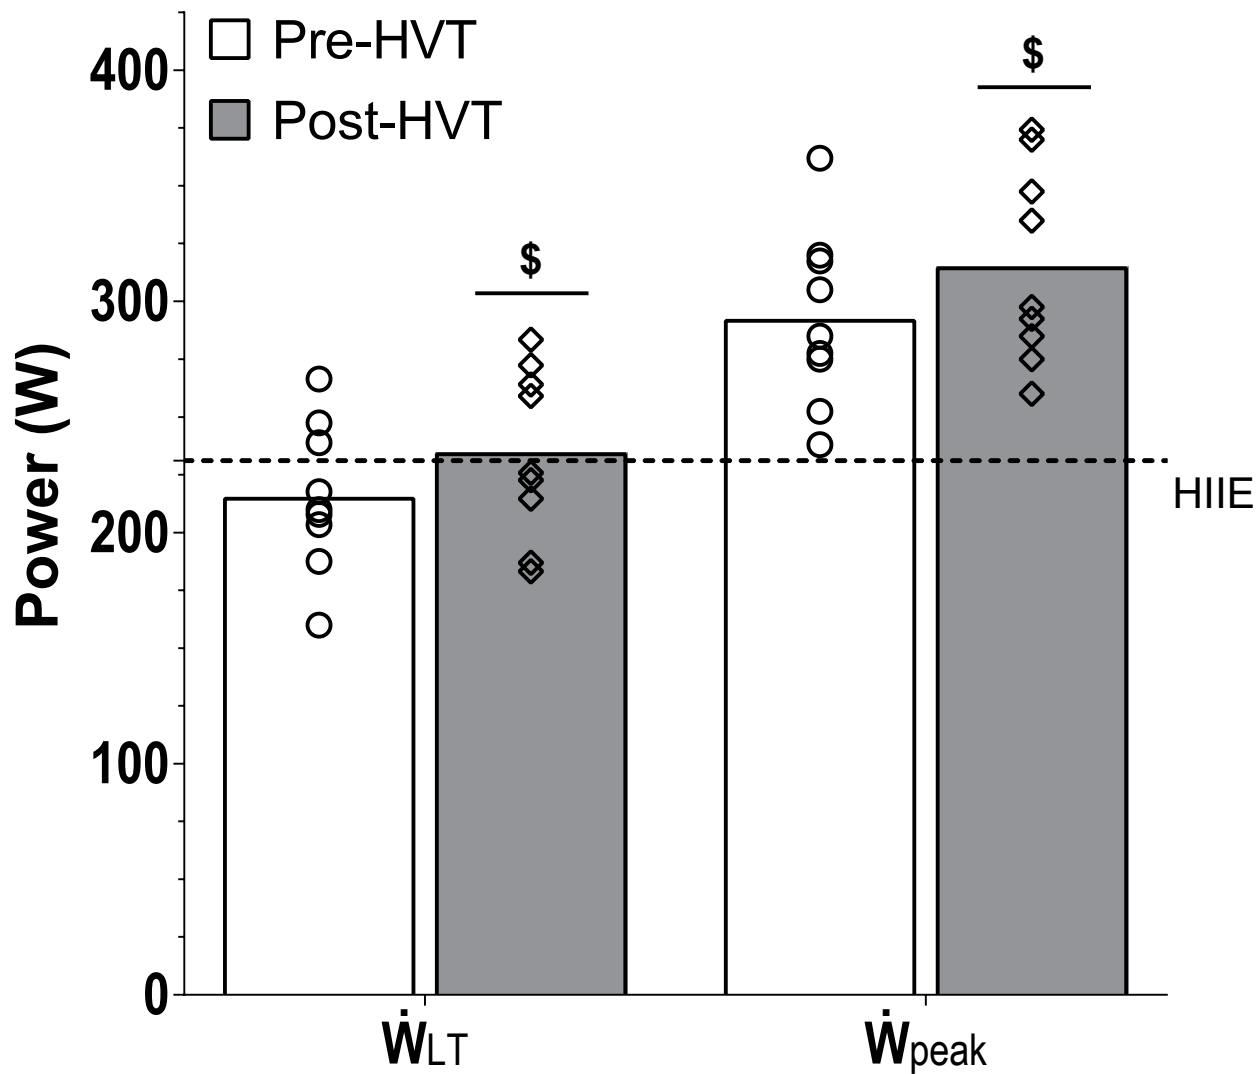

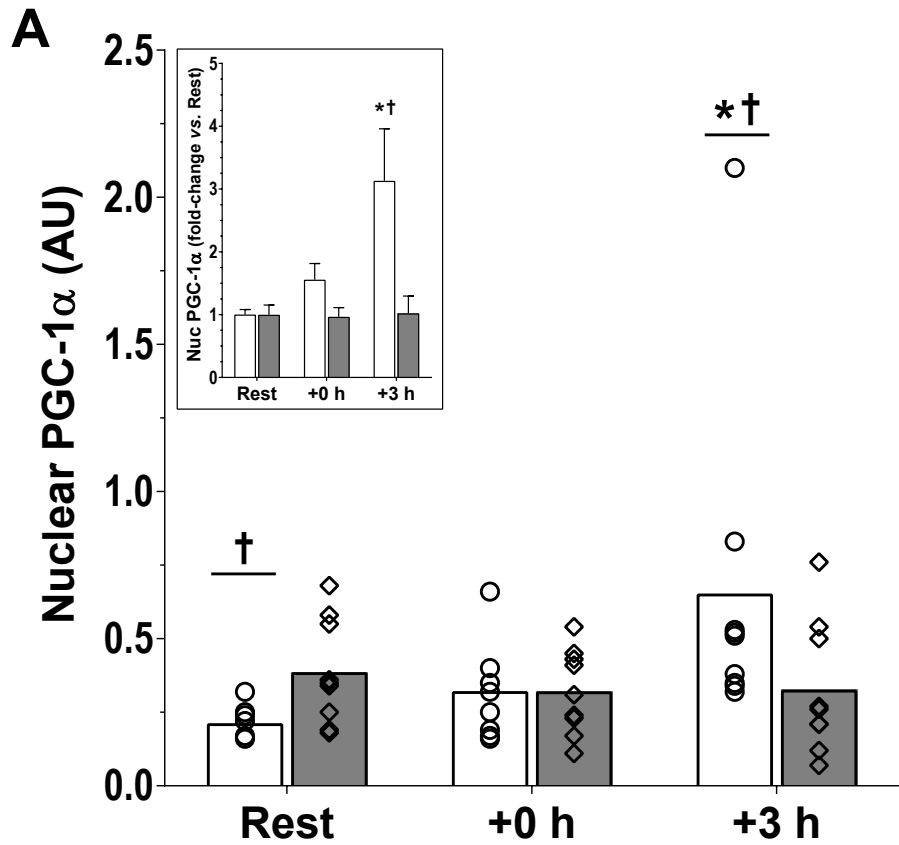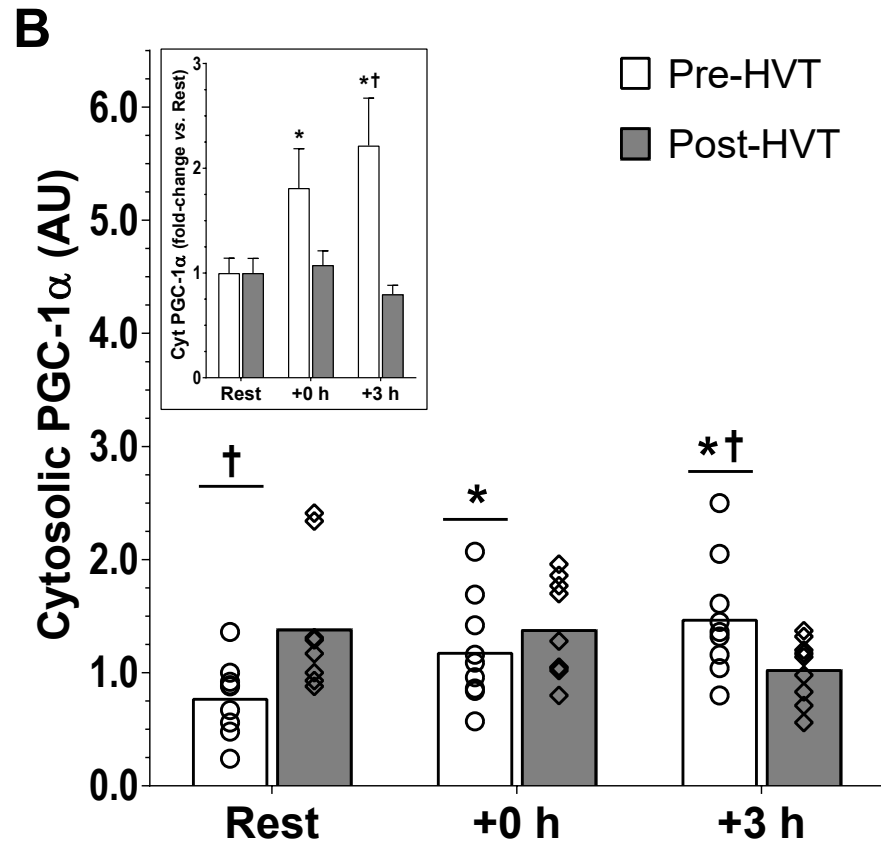

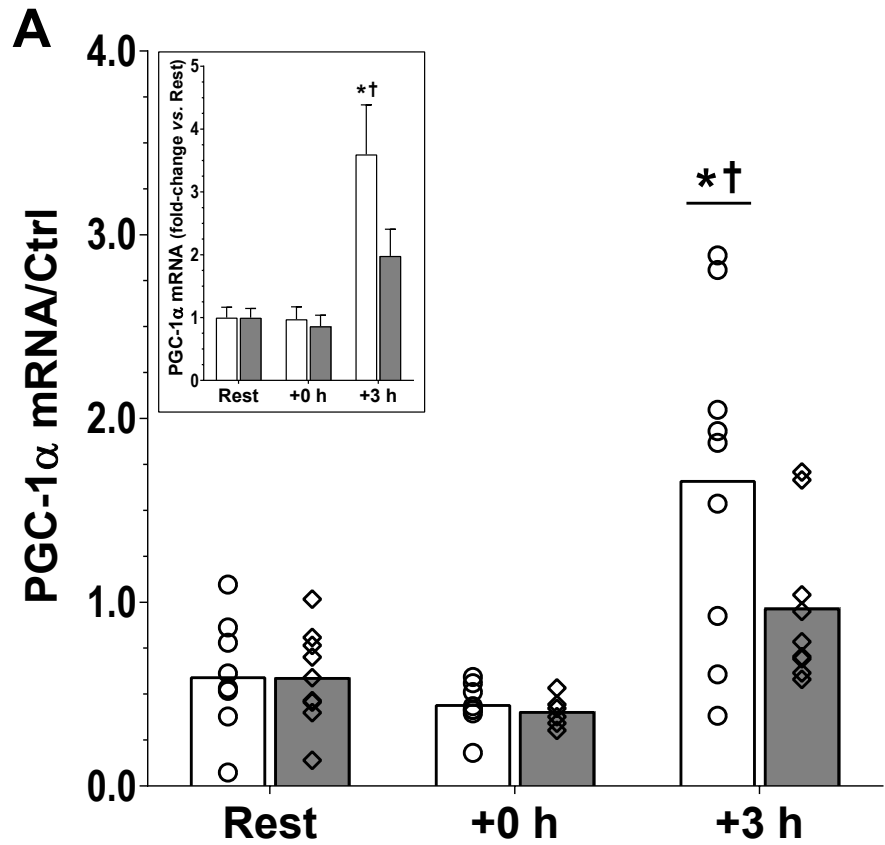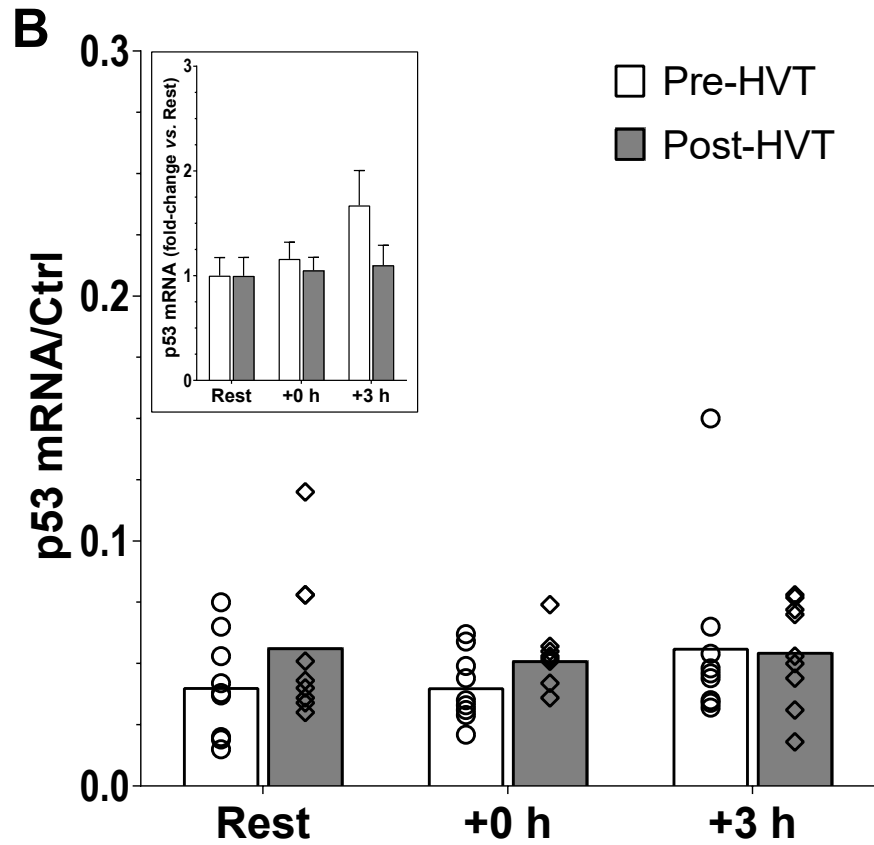

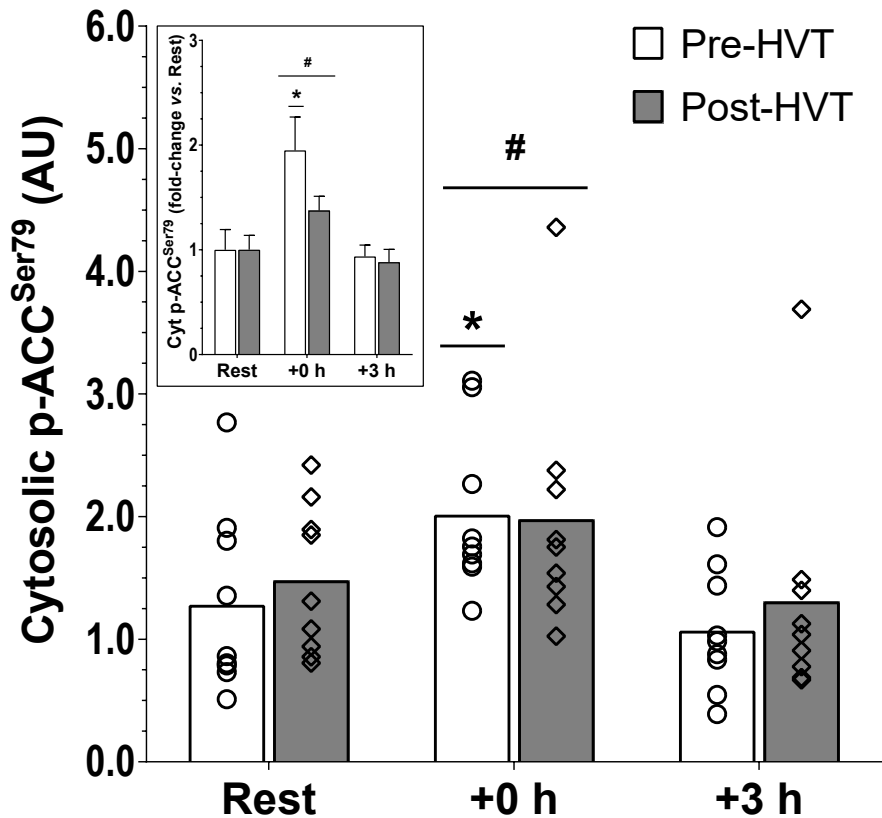

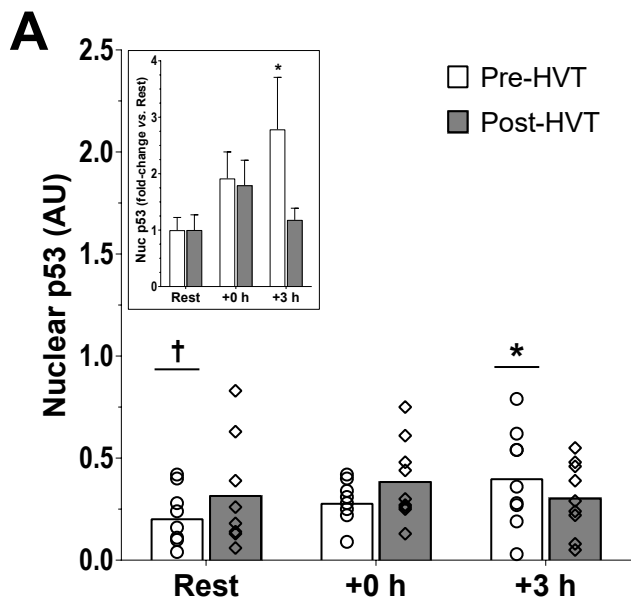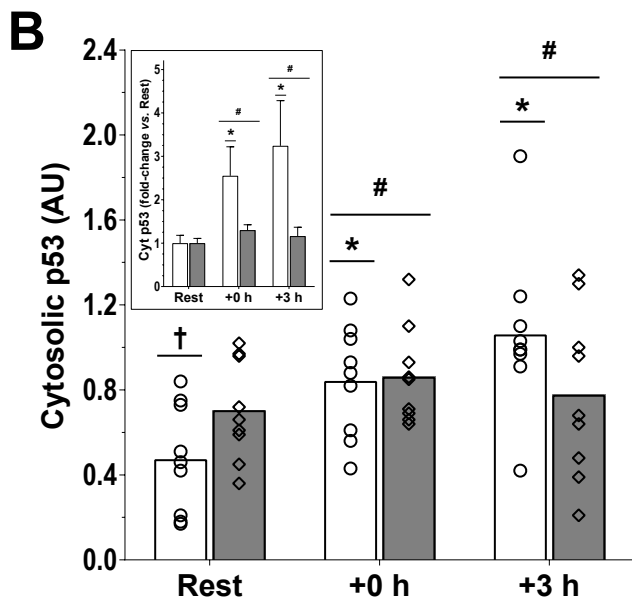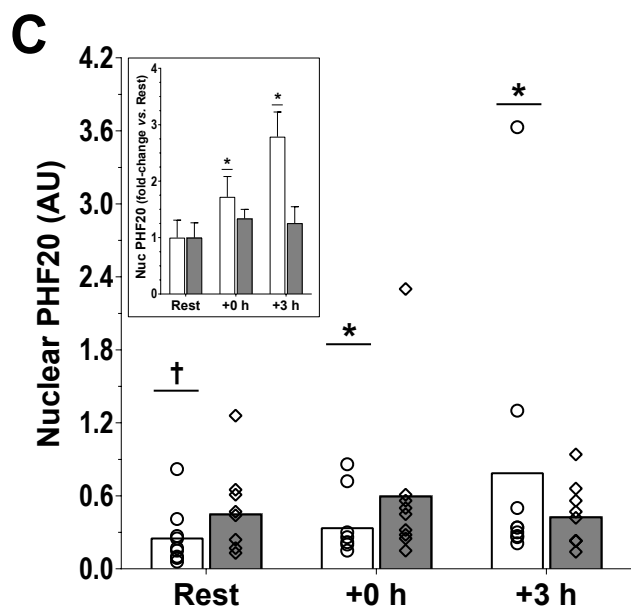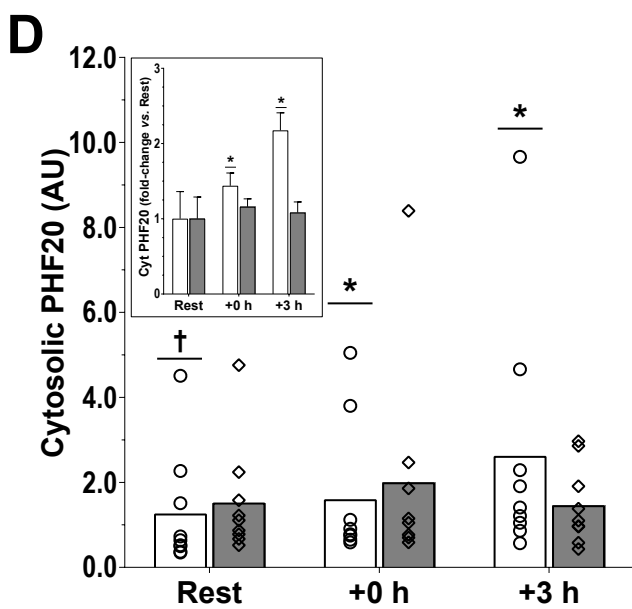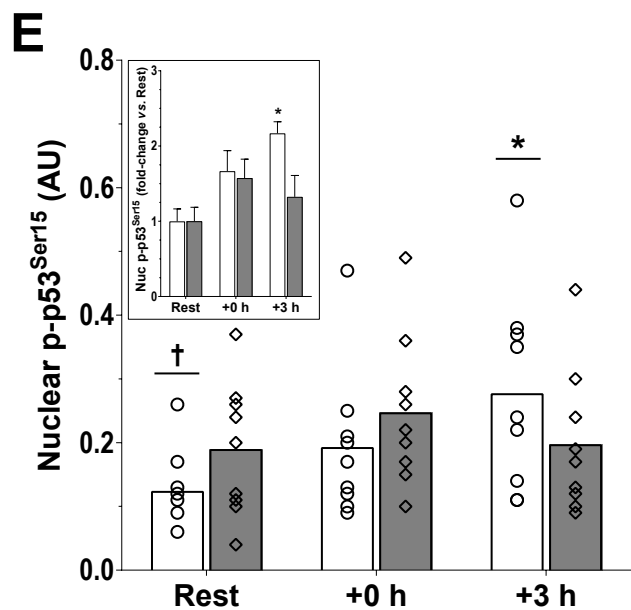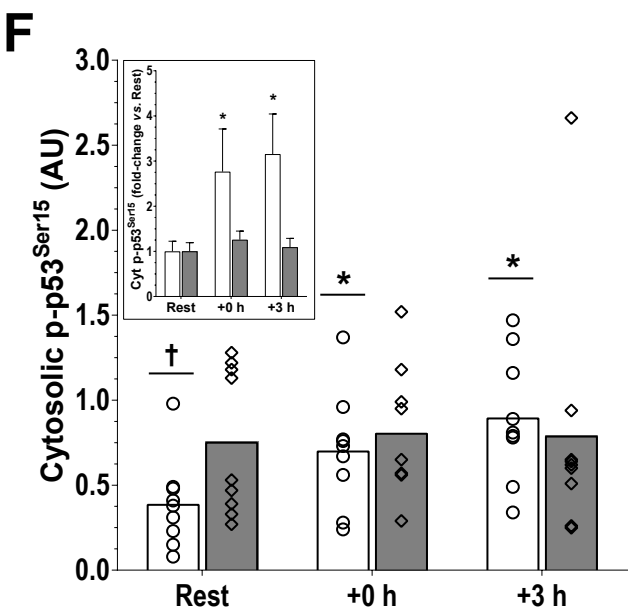

Source: https://www.biorxiv.org/content/10.1101/580373v3.full.pdf
